# Supplementary material for: Molecular diversity in several pyridyl based Cu(ii) complexes: biophysical interaction and redox triggered fluorescence switch
Source: Royal Society of Chemistry journal article supplement (doi:10.1039/c6nj02381a), 2016-01-01
Supplement: c6nj02381a1.pdf [file c6nj02381a1.pdf]

## Electronic Supporting Information (ESI)

### Molecular diversity in several pyridyl based Cu(II) complexes: Biophysical interaction and red-ox triggered fluorescence switch

Sangita Adhikari<sup>a</sup>, Animesh Sahana<sup>a</sup>, Babli Kumari<sup>a</sup>, Durba Ganguly<sup>b</sup>, Saurabh Das<sup>b</sup>, Prajna Paramita Banerjee<sup>c</sup>, Gautam Banerjee<sup>c</sup>, Ansuman Chatterjee<sup>c</sup>, Jesús Sanmartín Matalobos<sup>\*d</sup>, Paula Brandão<sup>e</sup>, Vítor Félix<sup>e,f\*</sup> and Debasis Das<sup>a\*</sup>

<sup>a</sup>Department of Chemistry, The University of Burdwan, Burdwan, WestBengal, India

<sup>b</sup>Department of Chemistry, Jadavpur University, Kolkata-700032, India

<sup>c</sup>Department of Zoology, Visva Bharati University, Santiniketan, West Bengal, India.

<sup>d</sup>Departamento de Química Inorgánica, Facultad de Química, Avda. Das Ciencias s/n, 15782 Santiago de Compostela, Spain.

<sup>e</sup>Department of Chemistry, CICECO – Aveiro Institute of Materials, 3810-193 Aveiro, Portugal.

<sup>f</sup>Department of Medical Sciences, iBiMED – Institute of Biomedicine, University of Aveiro, 3810-193 Aveiro, Portugal.

#### Contents

1. General method: UV-Vis and fluorescence titration
2. Determination of binding constant
3. Calculation of the detection limit
4. Studies on interaction of c t DNA with **C1a** using UV-Vis spectroscopy
5. Fig. S1. X-ray structure of **L1** with the thermal ellipsoids drawn at the 30% probability level
6. Fig. S2. Perspective view of  $[\text{Cu}(\text{py})_2(\text{H}_2\text{O})(\text{SO}_4)] \cdot 2\text{H}_2\text{O}$  (**C1a**) with the thermal ellipsoids drawn at the 70% probability level showing the copper(II) octahedral coordination sphere exhibited by the two independent molecules. The hydrogen bonds are drawn as green dashed lines.
7. Fig. S3. Perspective views of the repeating units in polymeric chains  $[\text{Cu}_2(\text{L}^1)_2(\text{H}_2\text{O})_3\text{Cl}_2]$  (top) and  $[\text{Cu}_2(\text{L}^1)_2(\text{H}_2\text{O})_3(\text{NO}_3)_2]$  (bottom) of **C1B** showing the relevant atomic notation scheme. Thermal ellipsoids are drawn at the 50% probability level. \* and \*\* stand for the symmetry operations  $3/2-x, -y, 1/2-z$  and  $+x, -1/4-y, 3/4-z$ , respectively.
8. Fig. S4. Molecular structure of  $[\text{Cu}_2(\text{L4})_4(\text{H}_2\text{O})_2] \cdot 1.12(\text{H}_2\text{O})$  (**C4**) with thermal ellipsoids drawn at the 70% of probability level showing the octahedral copper centres assembled by four NN ligands. The disordered naphthyle-2-ylmethyl substituents are shown in the position with slightly higher occupancy of 55%. The hydrogen bonds between the coordinated and crystallization water molecules are drawn as green dashed lines.

9. Fig. S5 TGA and DTA plot of **C1a**
10. Fig. S6 TGA and DTA plot of **C1b**
11. Fig. S7 Thermogram of **C2**
12. Fig. S8 Thermogram of **C3**
13. Fig. S9 TGA and DTA plot of **C4**
14. Fig. S10 PXRD pattern of **C1a**
15. Fig. S11 PXRD pattern of **C1b**
16. Fig. S12 PXRD pattern of **C4**
17. Fig. S13 Benesi-Hildebrand plot for measurement of binding constant of **L1** with  $\text{Cu}^+$
18. Fig. S14 Stern-Volmer plot for determination of quenching constant of **L1** for  $\text{Cu}^{2+}$
19. Fig. S15 Stern-Volmer plot for determination of quenching constant of **L2** for  $\text{Cu}^{2+}$
20. Fig. S16 Stern-Volmer plot for determination of quenching constant of **L3** for  $\text{Cu}^{2+}$
21. Fig. S17 Stern-Volmer plot for determination of quenching constant of **L4** for  $\text{Cu}^{2+}$
22. Fig. S18 Bar diagram showing interference of other cations for determination of  $\text{Cu}^+$  using **L1**
23. Fig. S19 Job's plot for determination of stoichiometry of interaction between **L1** and  $\text{Cu}^+$ .
24. Fig. S20 ESI-MS of mixture of **L1** and  $\text{Cu}^+$  in solution
25. Fig. S21. Emission intensity of **L1** as function of added  $\text{Cu}^+$
26. Fig. S22 Double-reciprocal plot for the evaluation of the apparent binding constant of **C1a** for ct DNA based on UV-Vis titration
27. Fig. S23 Cyclic voltammogram of  $\text{Cu}^{2+}$  complexes in acetonitrile
28. Fig. S24 ESI-MS of **L2**
29. Fig. S25 UV-Vis spectrum of **L2** in acetonitrile.
30. Fig. S26 FTIR spectrum of **L2**
31. Fig. S27  $^1\text{H}$ NMR spectrum of **L2** in  $\text{CDCl}_3$
32. Fig. S28  $^{13}\text{C}$ NMR spectrum of **L2** in  $\text{CDCl}_3$
33. Fig. S29 ESI-MS of **L4**
34. Fig. S30 UV-Vis spectrum of **L4** in acetonitrile.
35. Fig. S31 FTIR spectrum of **L4**
36. Fig. S32  $^1\text{H}$ NMR spectrum of **L4** in  $\text{DMSO-d}_6$
37. Fig. S33  $^{13}\text{C}$ NMR spectrum of **L4** in  $\text{DMSO-d}_6$
38. Fig. S34 FTIR spectrum of **C1a**
39. Fig. S35 UV-Vis spectrum of **C1a** in acetonitrile
40. Fig. S36 FTIR spectrum of **C2**
41. Fig. S37 ESI-MS of **C2**
42. Fig. S38 FTIR spectrum of **C3**
43. Fig. S39 ESI-MS of **C3**
44. Fig. S40 UV-Vis spectrum of **C3** in acetonitrile
45. Fig. S41 FTIR spectrum of **C4**
46. Table S1. Bond lengths and bond angles in the  $\text{Cu(II)}$  coordination sphere of **C1a**
47. Table S2. Hydrogen bond dimensions of **C1a**
48. Table S3. Selected bond lengths ( $\text{\AA}$ ) and bond angles ( $^\circ$ ) of **C1b**
49. Table S4. Selected bond lengths ( $\text{\AA}$ ) and bond angles ( $^\circ$ ) of **C4**

50. Table S5. Crystal data and selected refinement parameters of L1, C1a, C1b and C4.  
51. References

### **General method of UV-Vis and fluorescence titration**

Path length of the cells used for absorption and emission studies is 1 cm. 1  $\mu$ M stock solution of **C1a** is prepared in acetonitrile/ water (1/1, v/v). Working solutions of ascorbic acid are prepared from their respective stock solutions. Emission studies of **L1** with  $\text{Cu}(\text{MeCN})_4\text{ClO}_4$  is done in acetonitrile solution. Fluorescence measurements are performed using 1nm x 1 nm slit width. Fluorescence spectra are recorded after 40 min of mixing of **C1** with ascorbic acid solution.

### **Determination of binding constant**

The binding constant of **L1** for  $[\text{Cu}^+]$  is determined using a modified Benesi–Hildebrand equation<sup>1</sup>:  $(I_{\text{max}} - I_0)/(I - I_0) = 1 + (1/K) (1/[\text{C}]^n)$  where  $I_{\text{max}}$ ,  $I_0$  and  $I$  are emission intensity values for **L1** in the presence of  $[\text{Cu}^+]$  at saturation, in the absence of  $[\text{Cu}^+]$  and at any intermediate  $[\text{Cu}^+]$  concentrations, respectively. A plot of  $(I_{\text{max}} - I_0)/(I - I_0) = 1 + (1/K) (1/[\text{C}]^n)$  (here  $n = 1$ ) yields the binding constant value from the slope.

### **Calculation of the detection limit**

Fluorescence titration of **L1** with  $\text{Cu}^+$  is carried out by adding aliquots of  $\mu\text{M}$  concentration of  $\text{Cu}^+$  to **L1**. The detection limit is obtained as the concentration, at which a sharp change in the emission intensity occurred, multiplied by the concentration of **L1**:<sup>1</sup>  $\text{DL} = C_L \times C_T$ , where  $C_L$  is the concentration of **L1**,  $C_T$  is the concentration of  $\text{Cu}^+$  at which fluorescence enhanced. Thus:  $\text{DL} = 1 \mu\text{M} \times 50 \mu\text{M} = 50 \mu\text{M}$

### **Studies on interaction of c t DNA with C1 using UV-Vis spectroscopy**

Interaction of c t DNA with **C1a** was studied with the help of UV-Vis spectroscopy [JASCO V-630 UV-Vis spectrophotometer]. Quartz cuvettes from STARNA Scientific Ltd (10mm×10mm) were used. Separate aliquots, containing a constant concentration of **C1a** (100  $\mu\text{M}$ ) and gradually increasing concentrations of c t DNA were used at pH 7.4. The total volume was constant (2.0 mL) using 20 mM Tris buffer and 120 mM NaCl, 35 mM KCl and 5 mM  $\text{MgCl}_2$ . When saturation was reached the concentration of c t DNA was  $\sim 15$  folds greater than the complex. The titration was repeated thrice. Binding constant and site size of interaction was determined using standard equations.<sup>2-15</sup>

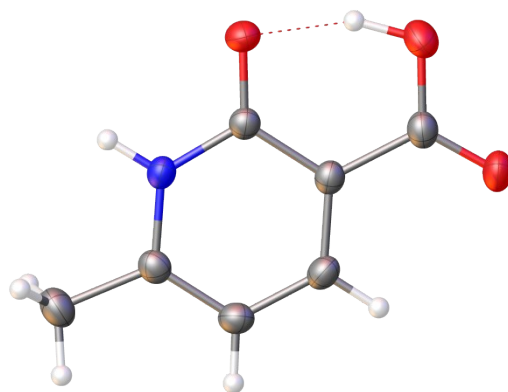

Fig. S1. X-ray structure of **L1**<sup>16</sup> with thermal ellipsoids at 30% probability level

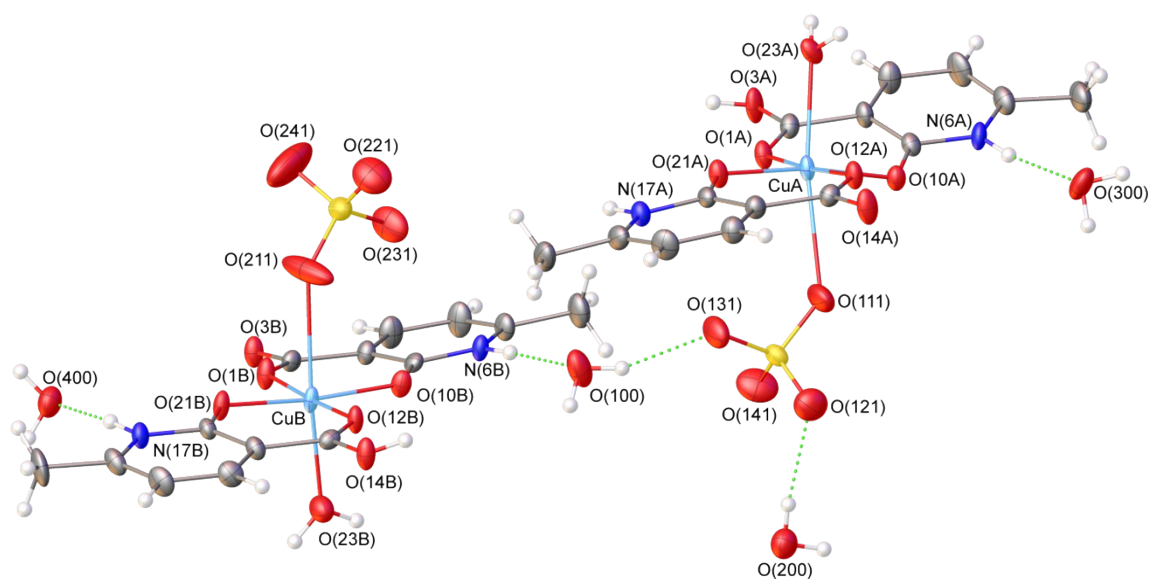

Fig. S2. Perspective view<sup>16</sup> of asymmetric unit of  $[\text{Cu}(\text{py})_2(\text{H}_2\text{O})(\text{SO}_4)] \cdot 2\text{H}_2\text{O}$  (**C1a**) with thermal ellipsoids at 70% probability level showing Cu(II) octahedral coordination sphere exhibited by two independent molecules. The hydrogen bonds are drawn as green dashed lines.

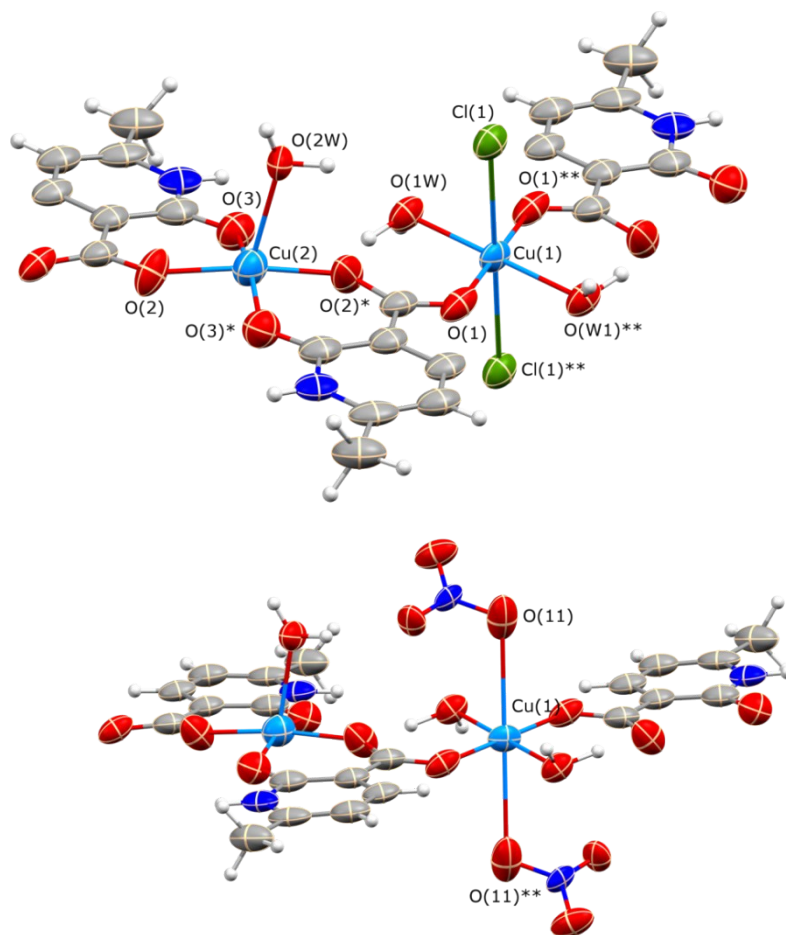

Fig. S3. Perspective views of the repeating units in polymeric chains  $[\text{Cu}_2(\mathbf{L}^1)_2(\text{H}_2\text{O})_3\text{Cl}_2]$  (top) and  $[\text{Cu}_2(\mathbf{L}^1)_2(\text{H}_2\text{O})_3(\text{NO}_3)_2]$  (bottom) of **C1B** showing relevant atomic notation scheme. Thermal ellipsoids are drawn at 50% probability level. \* and \*\* stand for the symmetry operations  $3/2-x, -y, 1/2-z$  and  $+x, -1/4-y, 3/4-z$ , respectively

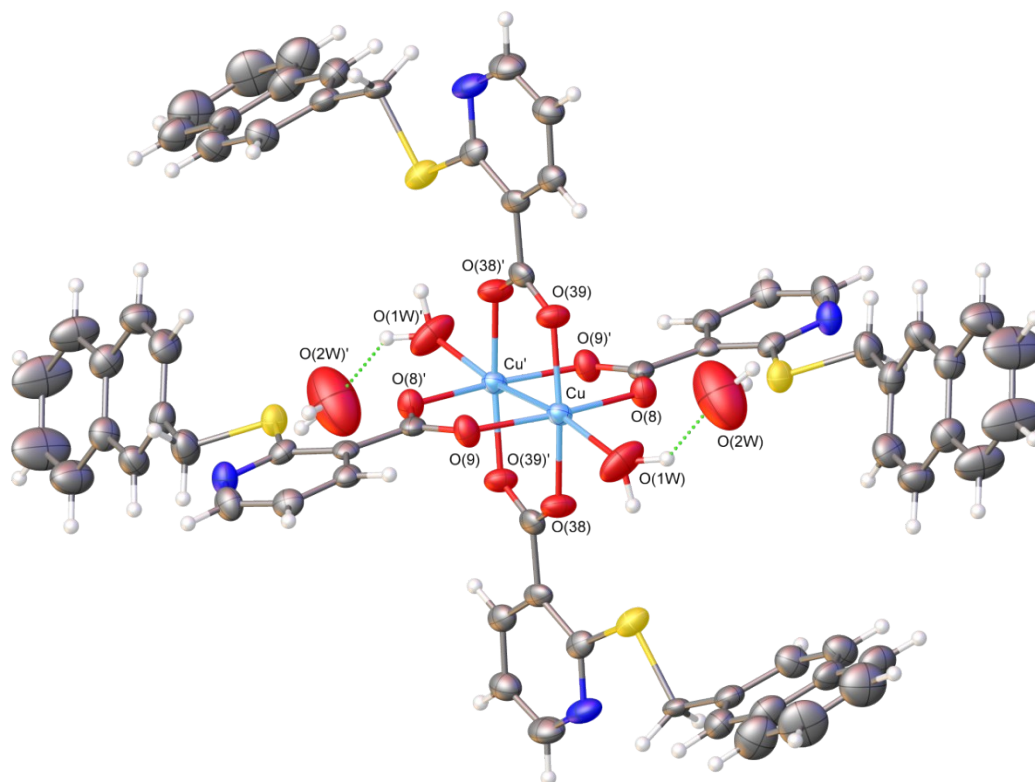

Fig. S4. Molecular structure of  $[\text{Cu}_2(\text{L4})_4(\text{H}_2\text{O})_2] \cdot 1.12(\text{H}_2\text{O}) (\text{C4})^{16}$  with thermal ellipsoids drawn at 70% probability level showing octahedral copper centres assembled by four ligands. The disordered naphthyle-2-ylmethyl substituents are shown in the position with slightly higher occupancy of 55%. The hydrogen bonds between coordinated and crystallization water molecules are drawn as green dashed lines.

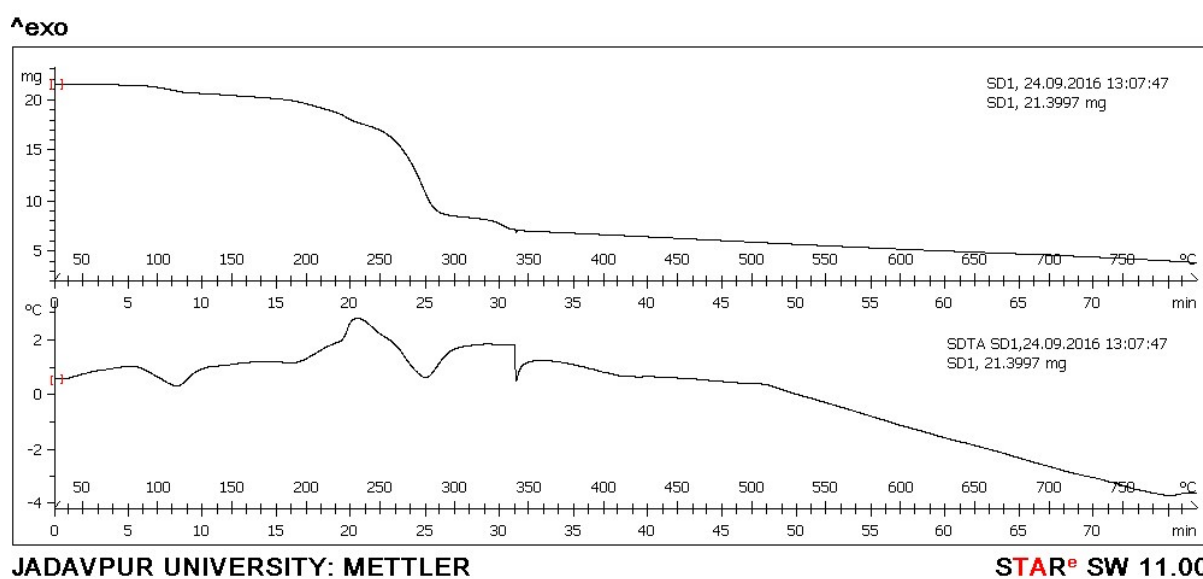

Fig. S5. TGA and DTA plot of C1a

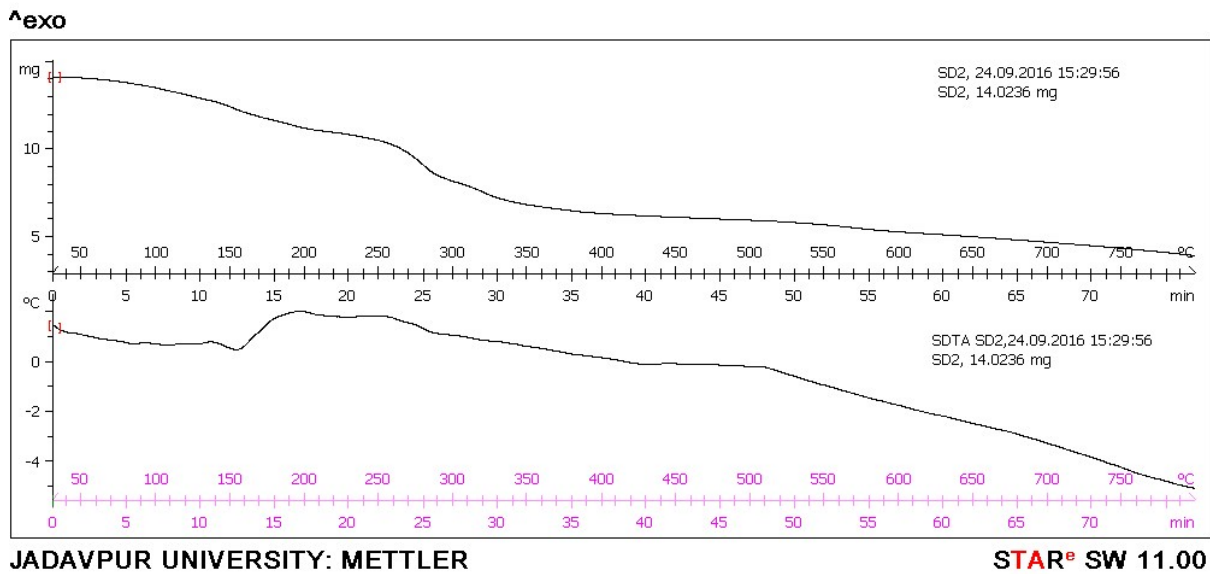

Fig. S6. TGA and DTA plot of C1b

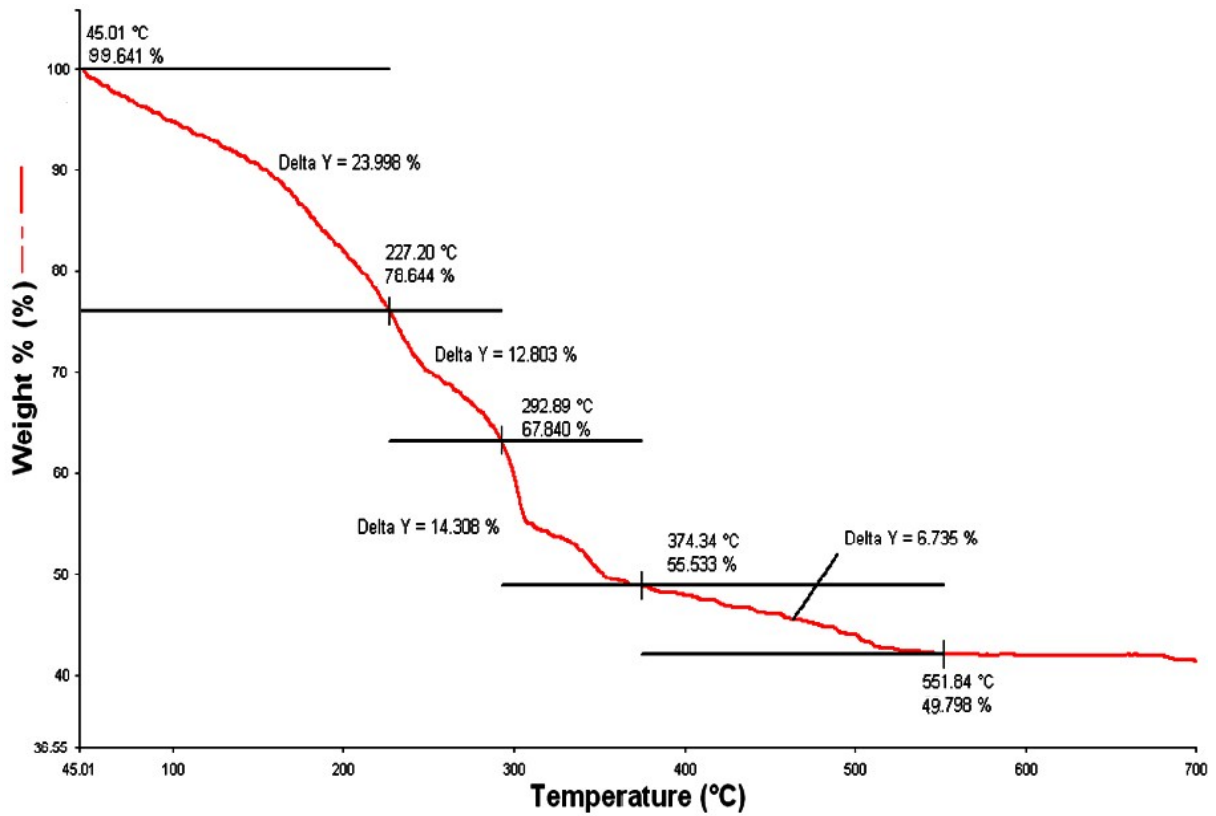

Fig. S7. Thermogram of C2

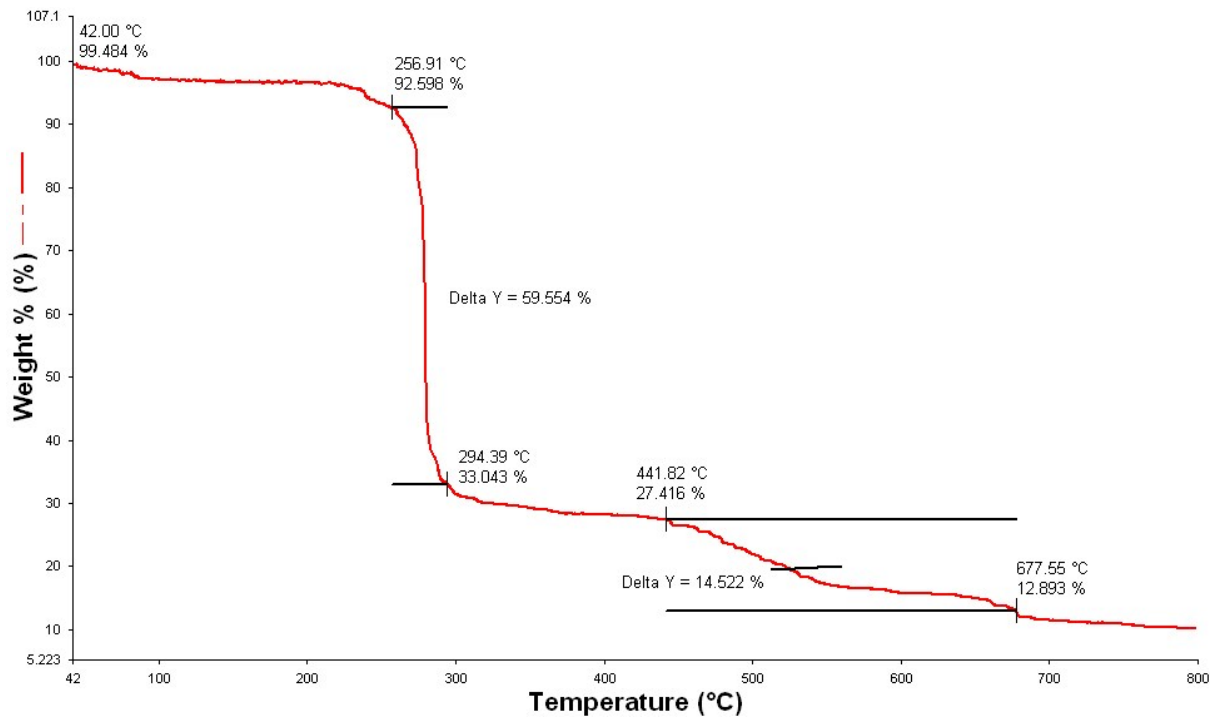

Fig. S8. Thermogram of C3

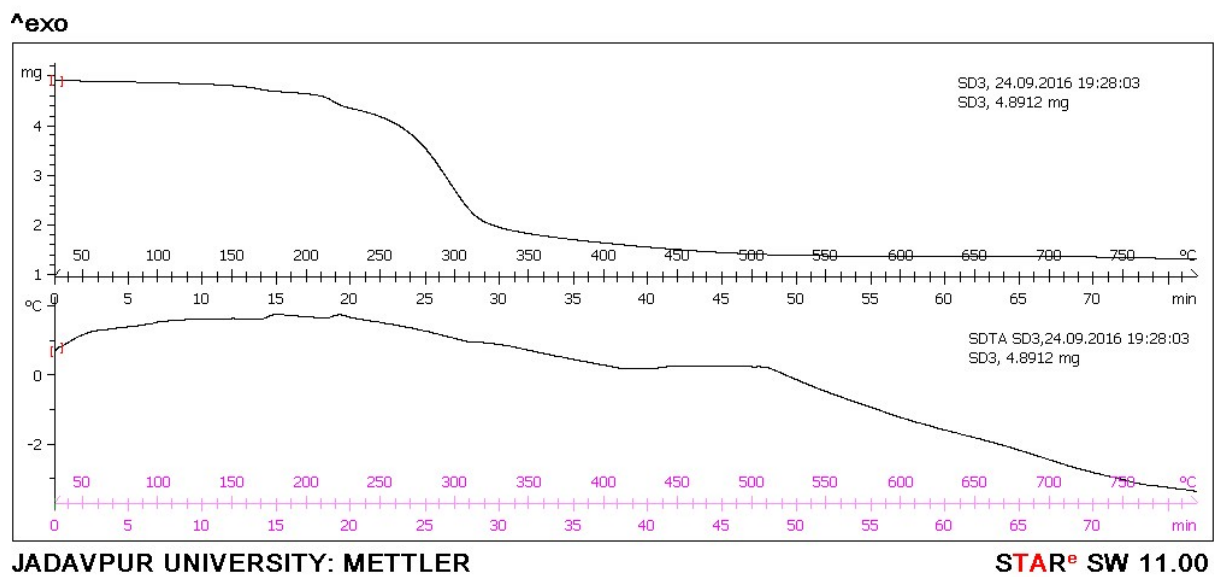

JADAVPUR UNIVERSITY: METTLER

STAR<sup>®</sup> SW 11.00

Fig. S9. TGA and DTA plot of C4



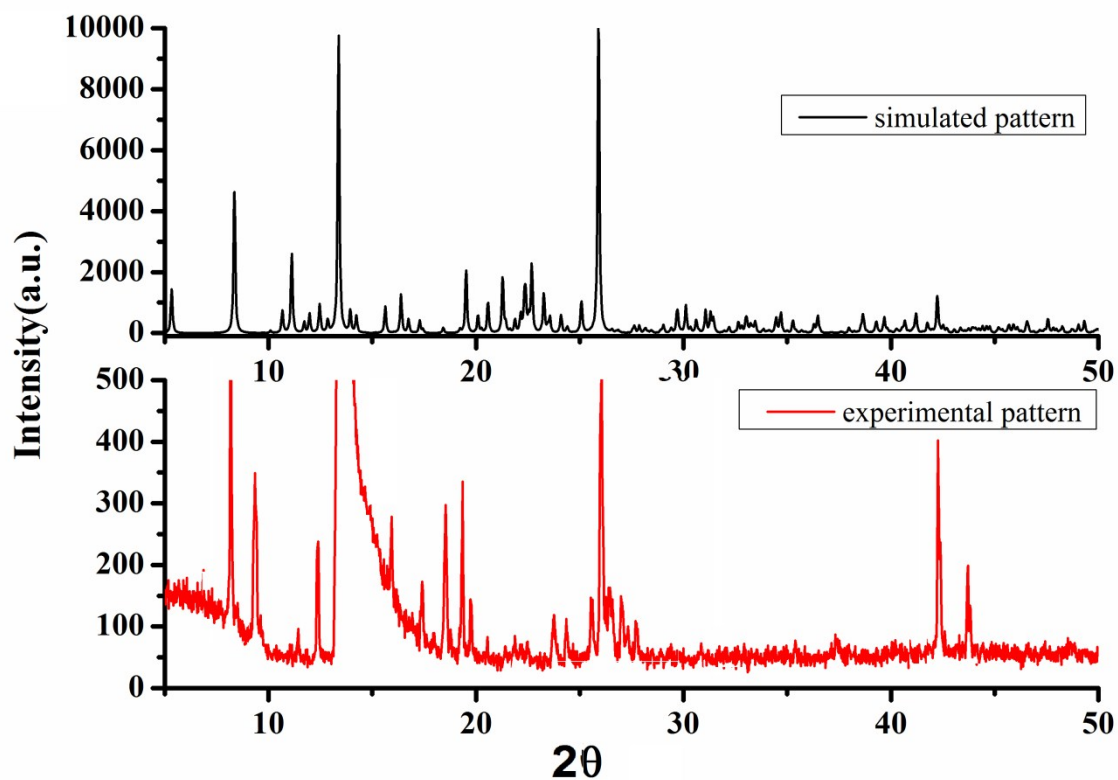

Fig. S10 PXRd pattern of C1a

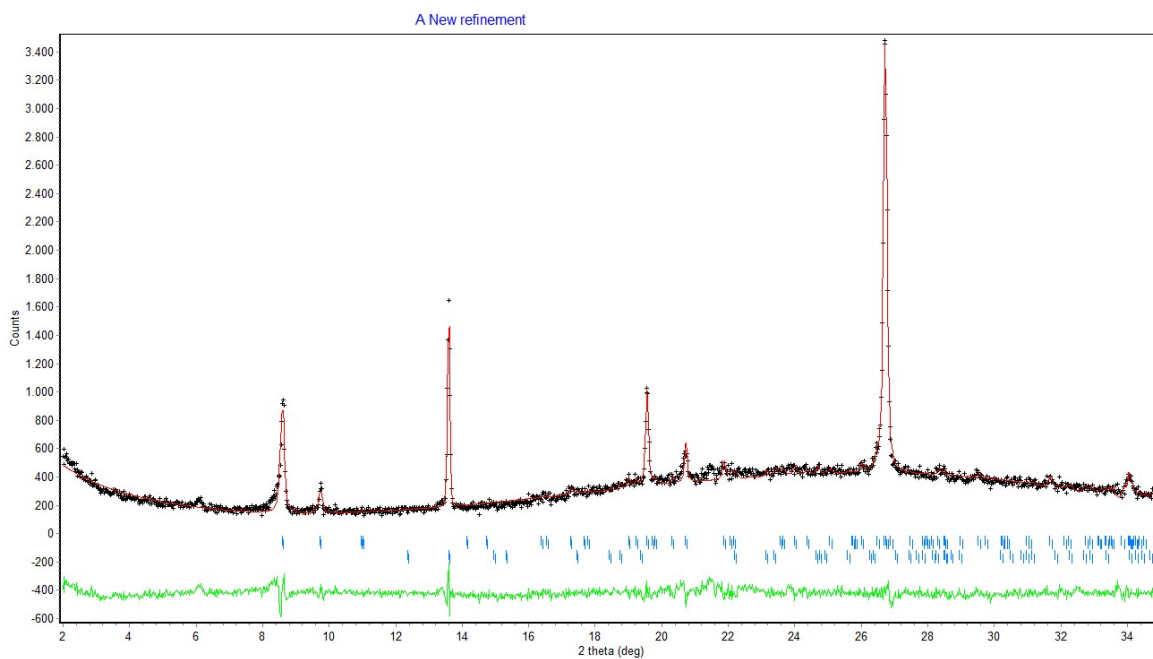

Fig. S11 PXRd pattern of C1b experimental diffractogram: black points; simulated diffractogram: red line.

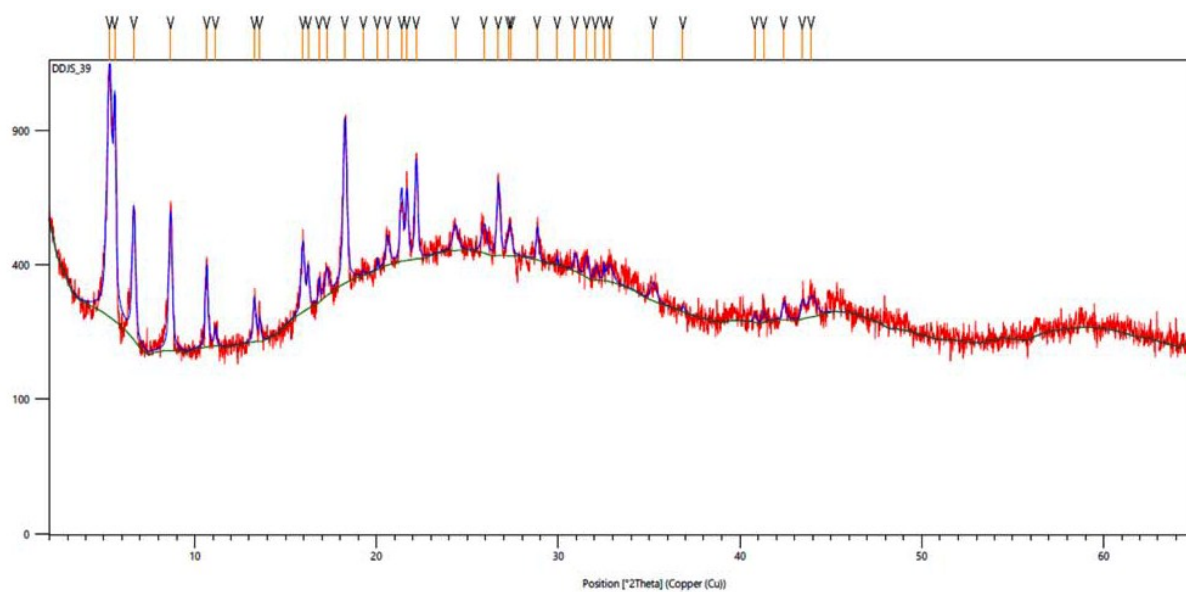

Fig. S12 PXRD pattern of C4; experimental diffractogram: red points; simulated diffractogram: blue line.

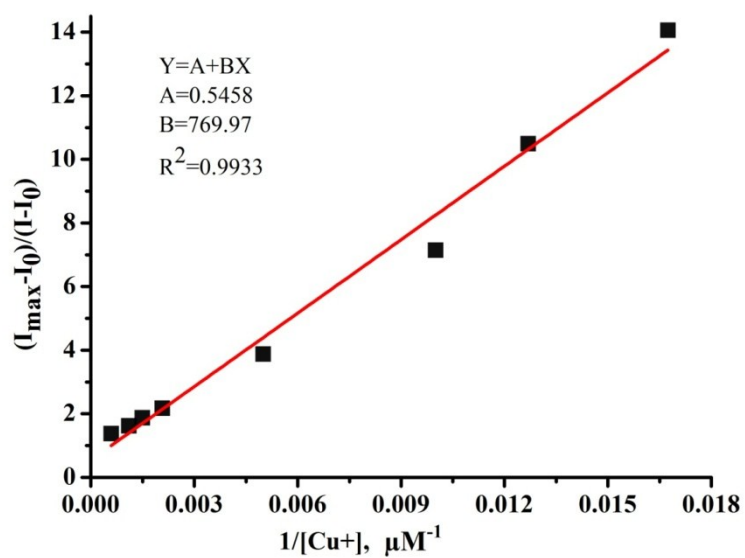

Fig.S13. Benesi-Hildebrand plot for determination of association constant of L1 with  $\text{Cu}(\text{MeCN})_4\text{ClO}_4$

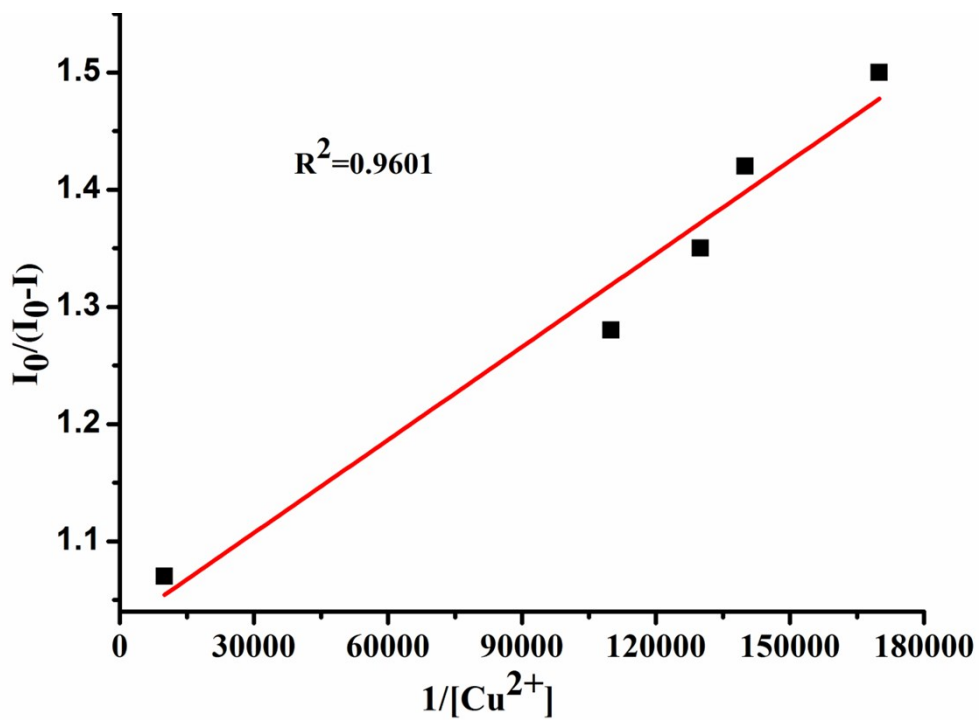

Fig. S14. Stern-Volmer plot for determination of quenching constant of L1 for  $Cu^{2+}$

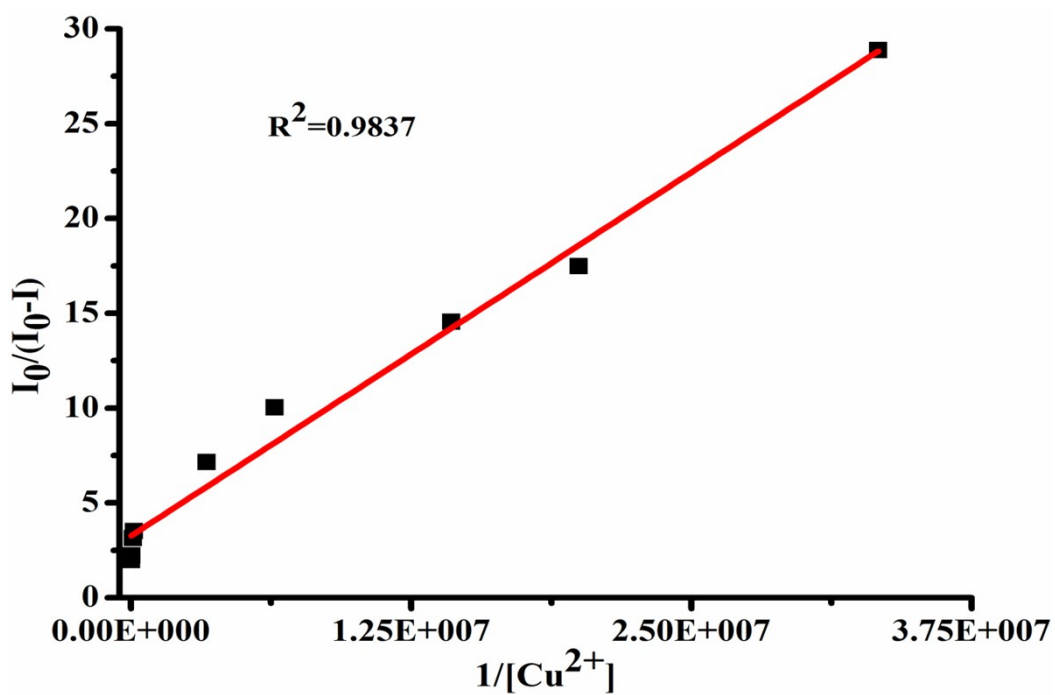

Fig. S15. Stern-Volmer plot for determination of quenching constant of L2 for  $Cu^{2+}$

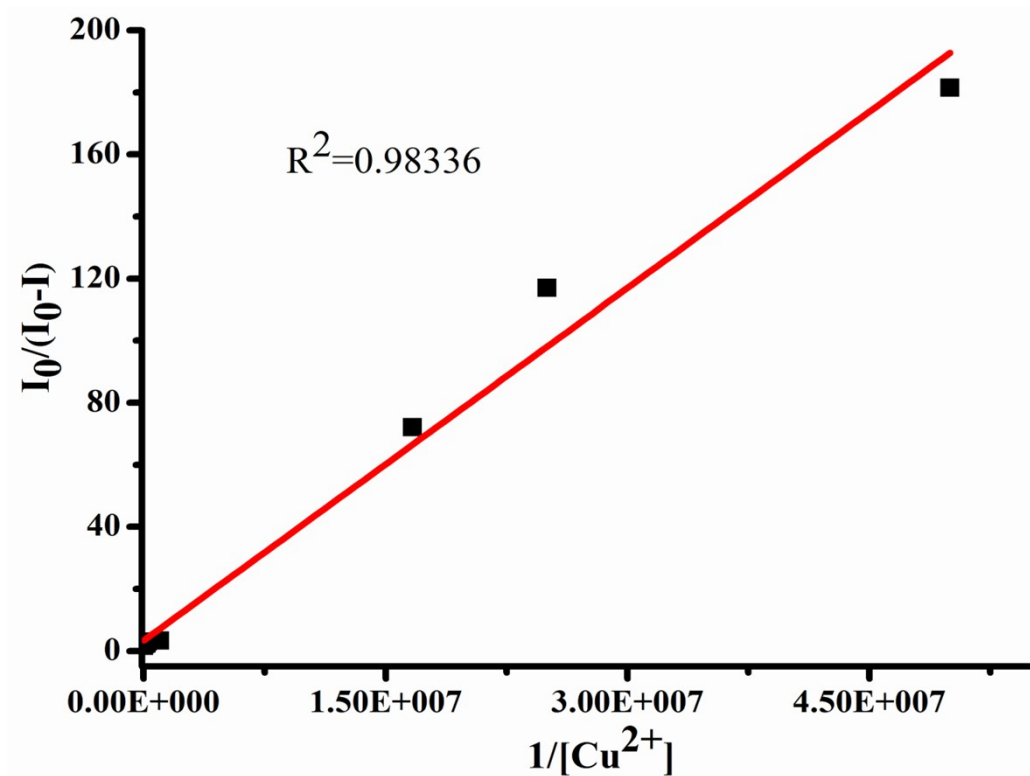

Fig. S16. Stern-Volmer plot for determination of quenching constant of L3 for  $Cu^{2+}$

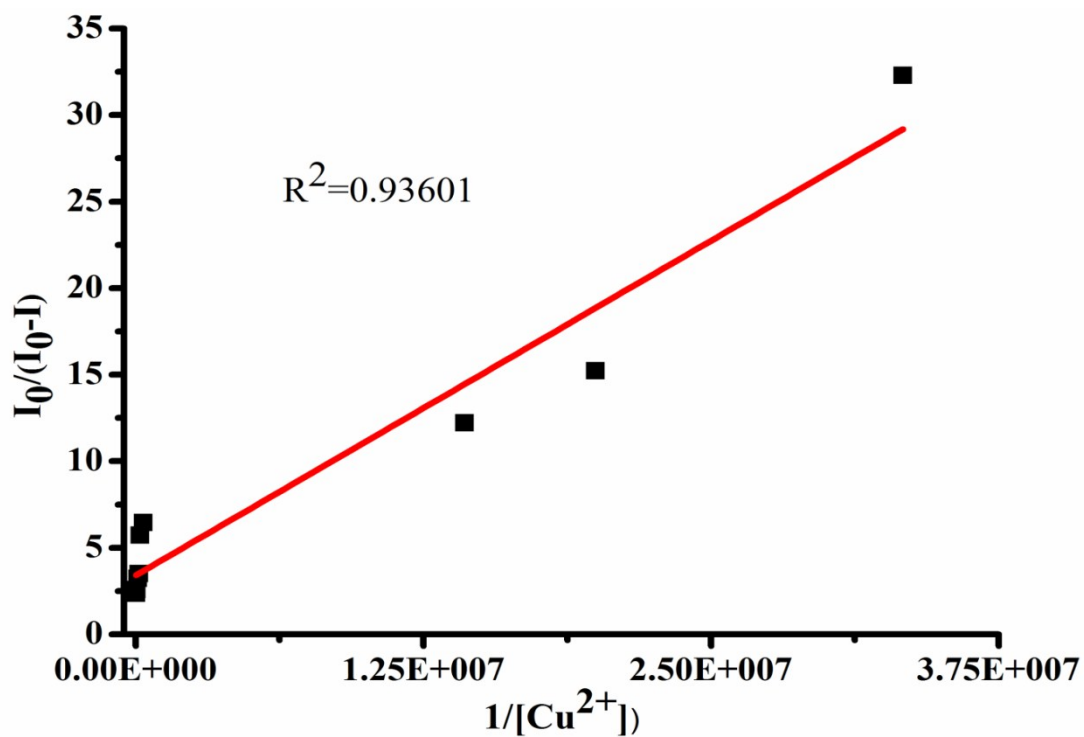

Fig. S17. Stern-Volmer plot for determination of quenching constant of L4 for  $Cu^{2+}$

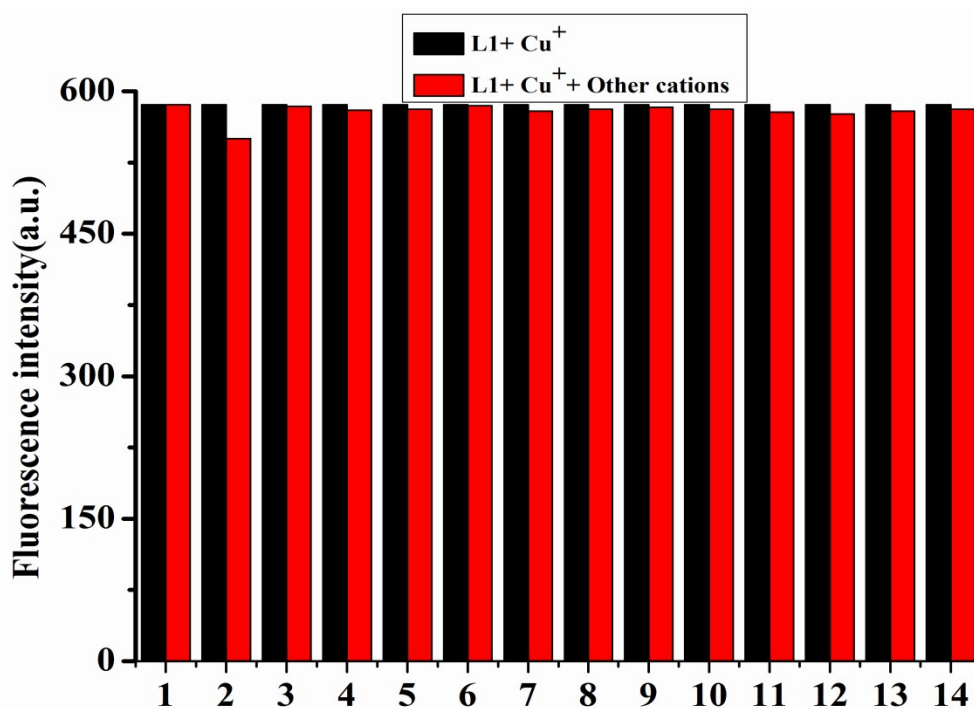

Fig. S18. Cation selectivity of **L1** (1  $\mu\text{M}$ ) in  $\text{CH}_3\text{CN}-\text{H}_2\text{O}$ , 1:1 v/v ( $\lambda_{\text{ex}} = 340 \text{ nm}$ ). Black bar: emission intensity of the [**L1**+  $\text{Cu}^+$ ] system; red bar: emission intensity of the [**L1**+  $\text{Cu}^+$ ] system in presence of 800  $\mu\text{M}$  of different cations, i.e. Blank (1),  $\text{Cu}^{2+}$  (2),  $\text{Hg}^{2+}$  (3),  $\text{Zn}^{2+}$  (4),  $\text{Pb}^{2+}$  (5),  $\text{Ag}^+$  (6),  $\text{Au}^+$  (7),  $\text{Sn}^{2+}$  (8),  $\text{Cr}^{3+}$  (9),  $\text{Al}^{3+}$  (10),  $\text{Fe}^{3+}$  (11),  $\text{Pd}^{2+}$  (12),  $\text{Cd}^{2+}$  (13) and  $\text{Fe}^{2+}$  (14)

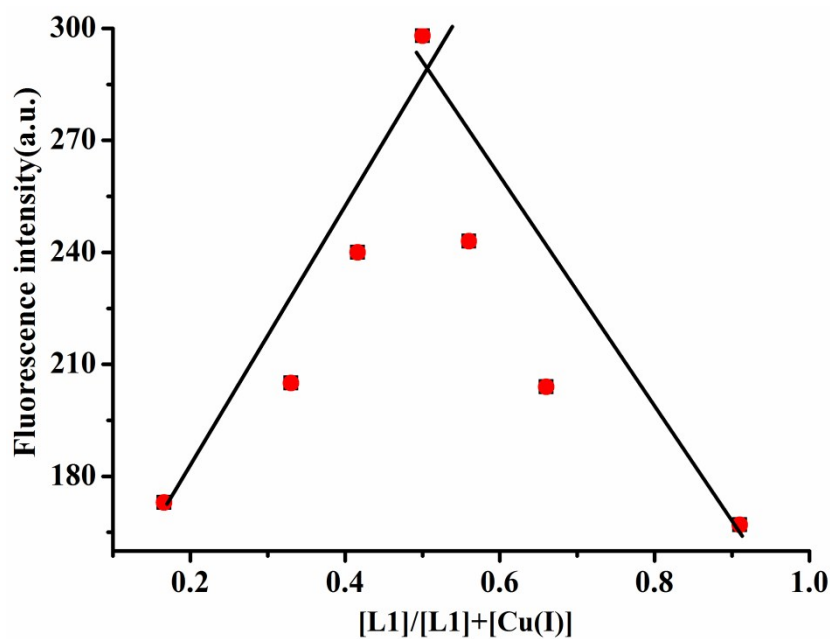

Fig. S19. Job's plot for determination of stoichiometry between **L1** and  $\text{Cu}^+$  in  $\text{CH}_3\text{CN}/\text{H}_2\text{O}$  (1/1, v/v)

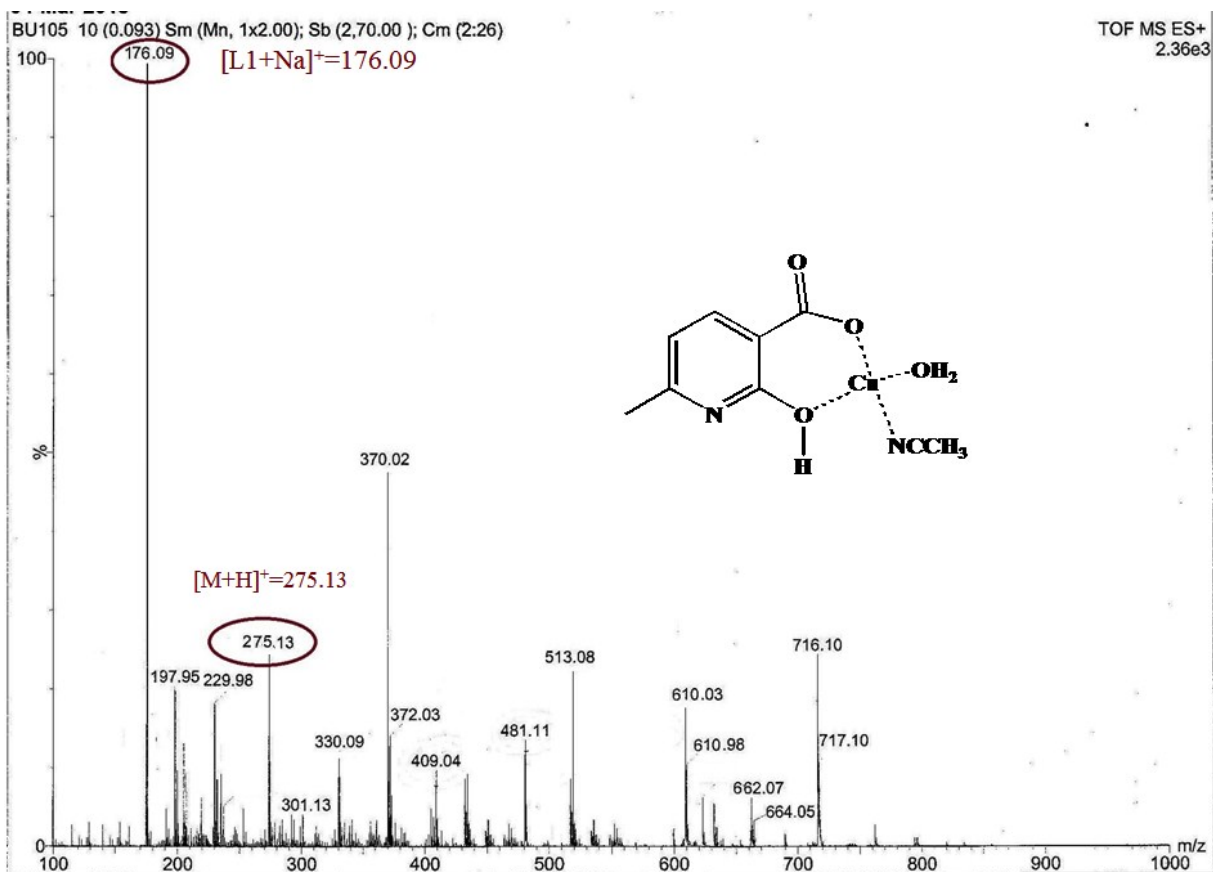

Fig. S20 ESI-MS spectra of the adduct between L1 and Cu<sup>+</sup> in solution

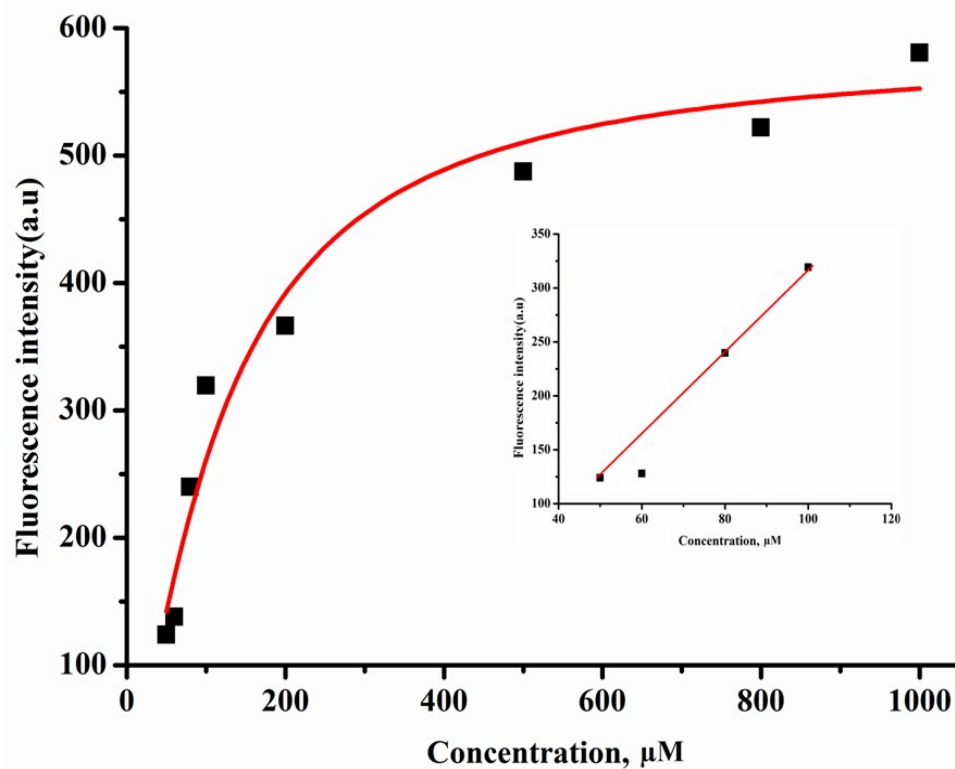

Fig. S21. Emission intensity of **L1** as function of added  $\text{Cu}^+$  (50–1000  $\mu\text{M}$ ). Inset: linear region, up to 100  $\mu\text{M}$   $\text{Cu}^+$

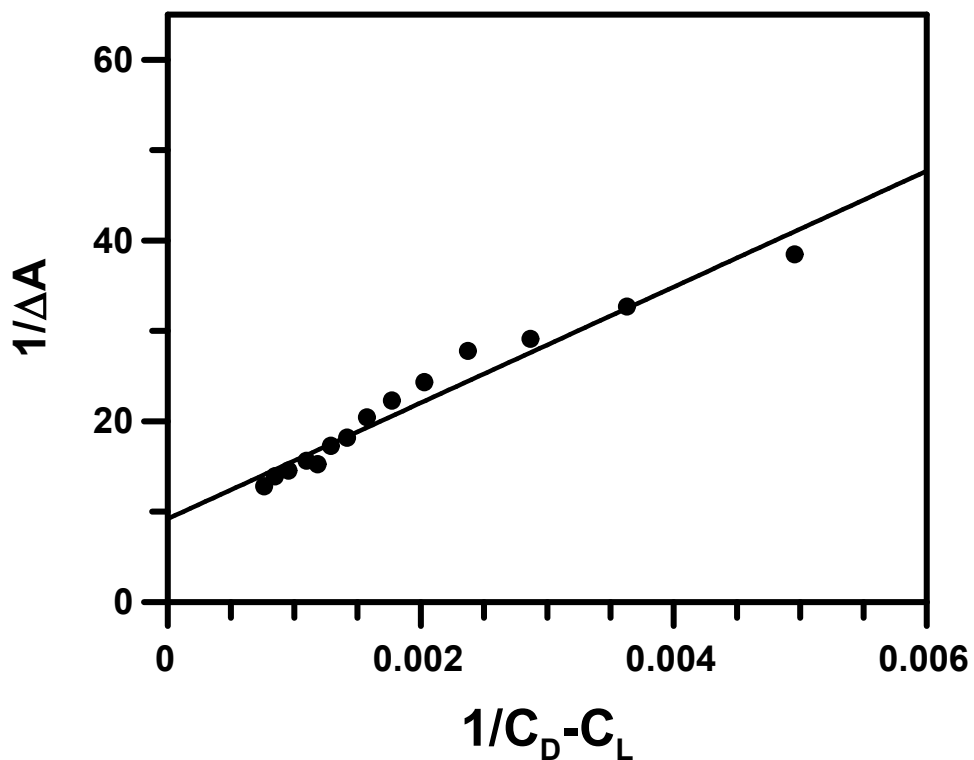

Fig. S22. Double-reciprocal plot for evaluation of apparent binding constant of **C1a** for c t DNA based on UV-Vis titration

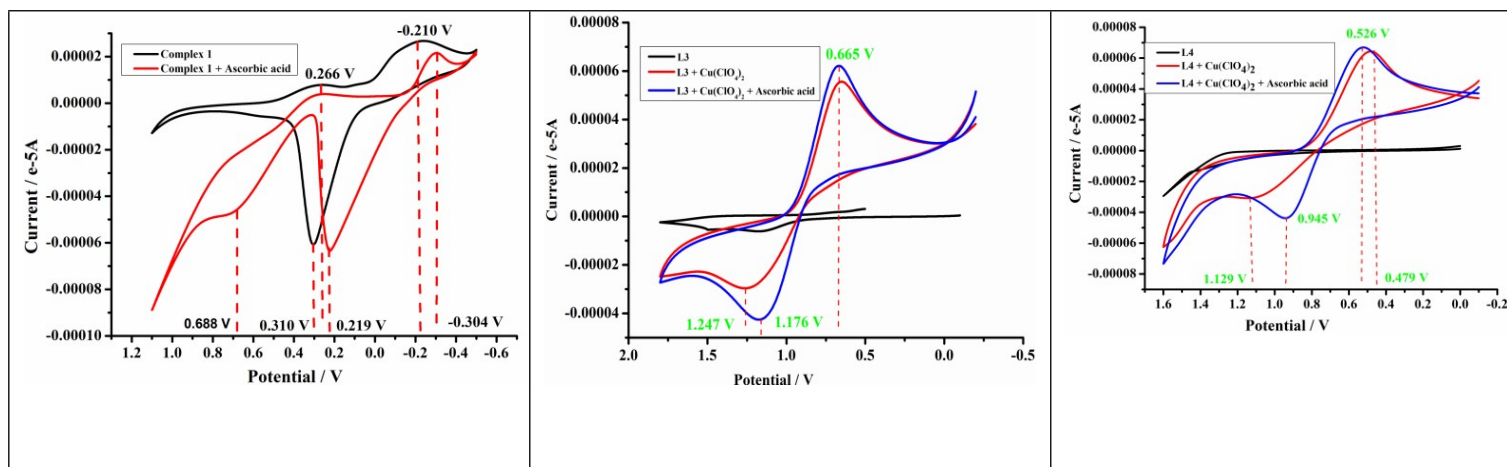

Fig. S23. Cyclic voltammogram of Cu<sup>2+</sup> complexes in acetonitrile

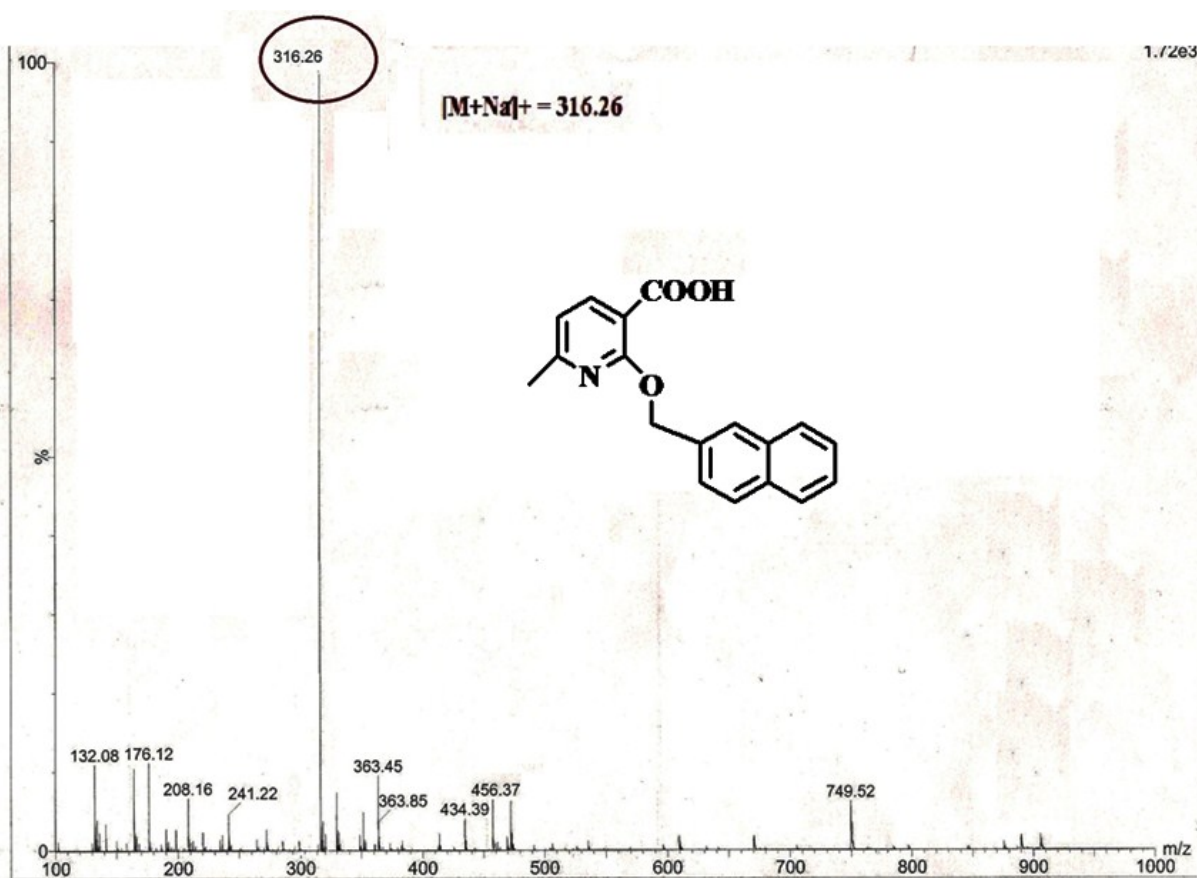

Fig.S24.ESI-MS of L2



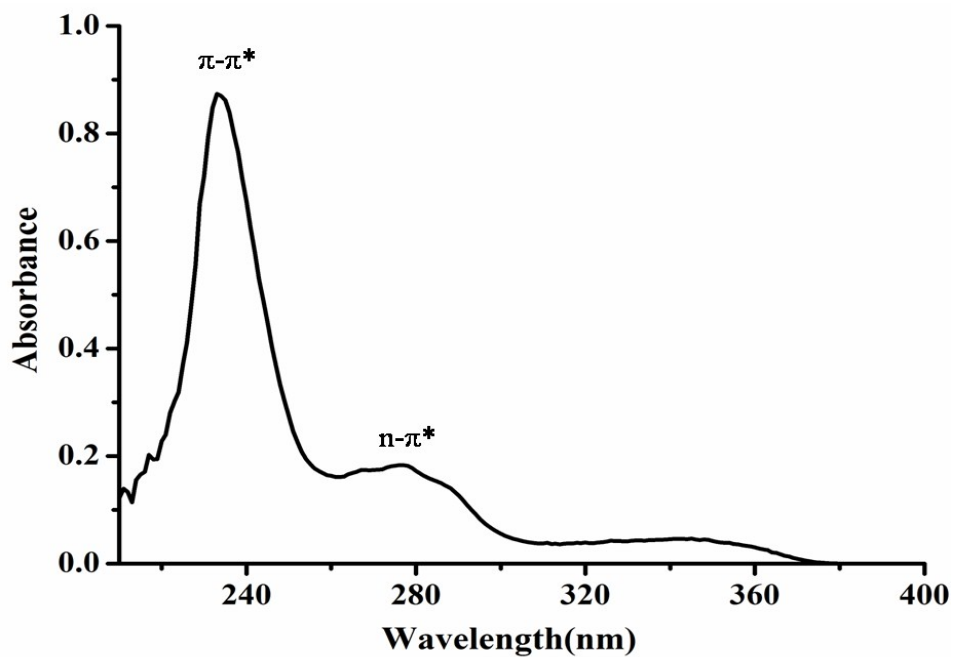

Fig. S25. UV-Vis spectrum of L2 in acetonitrile

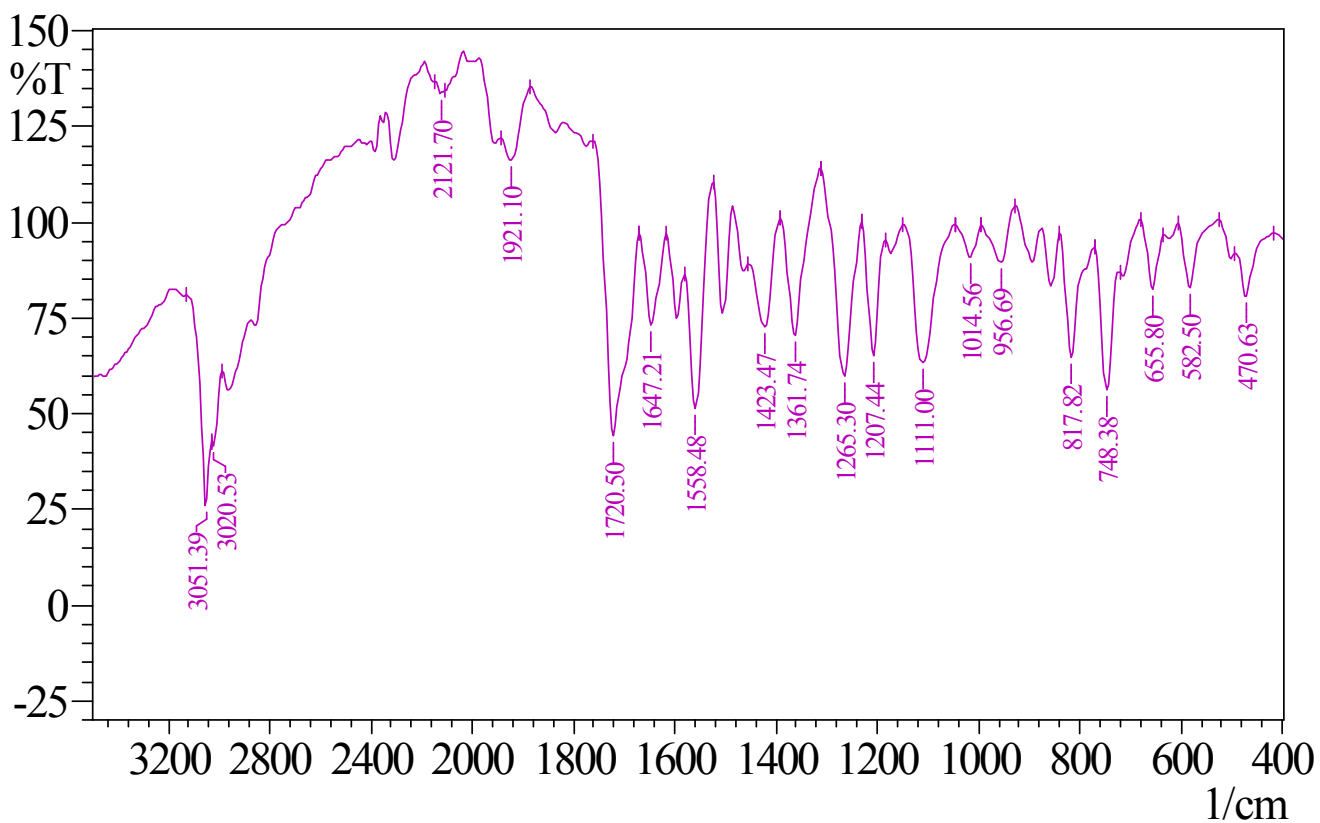

Fig. S26. FTIR spectrum of L2

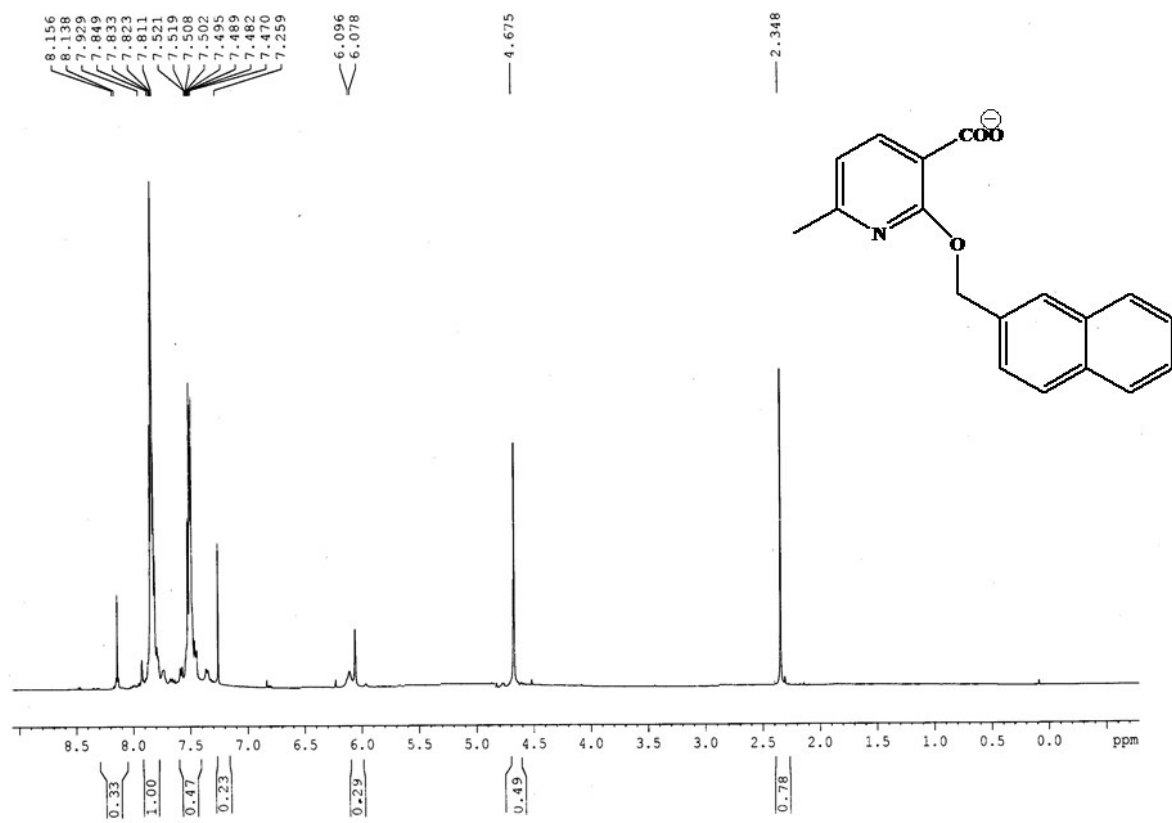

Fig. S27. <sup>1</sup>H NMR spectrum of L2 in CDCl<sub>3</sub>

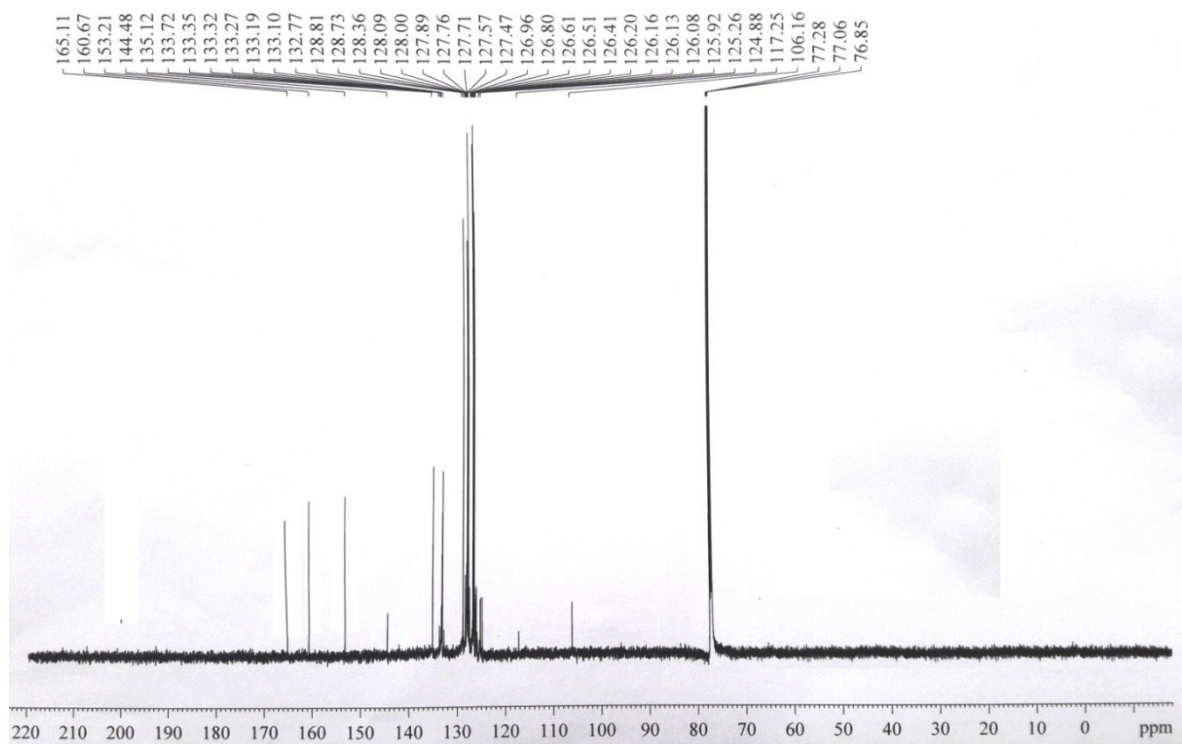

Fig. S28. <sup>13</sup>C NMR spectrum of L2 in CDCl<sub>3</sub>

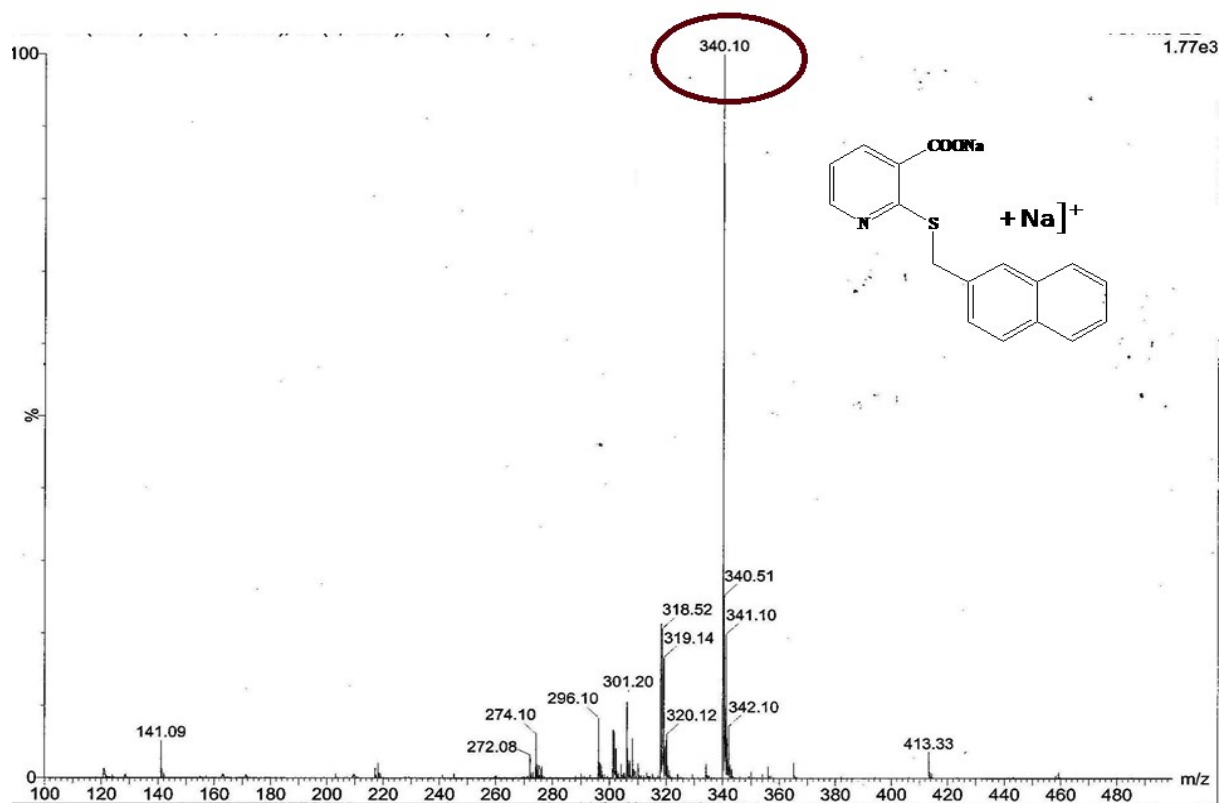

Fig. S29. ESI-MS of L4

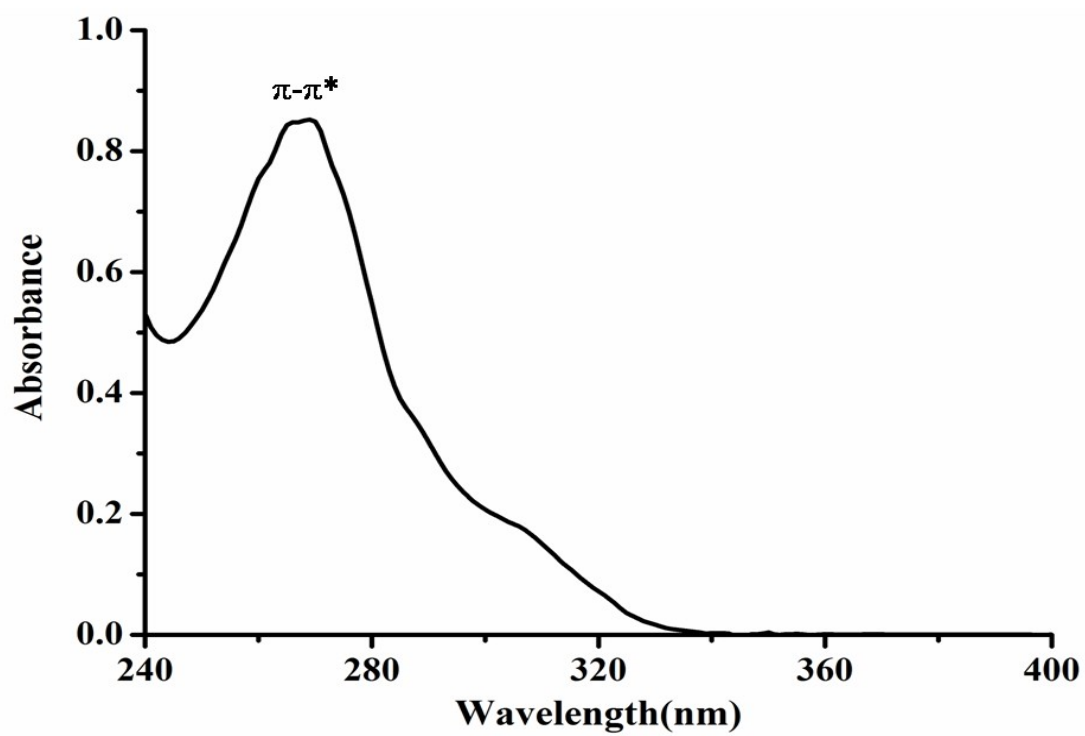

Fig. S30. UV-Vis spectrum of L4 in acetonitrile

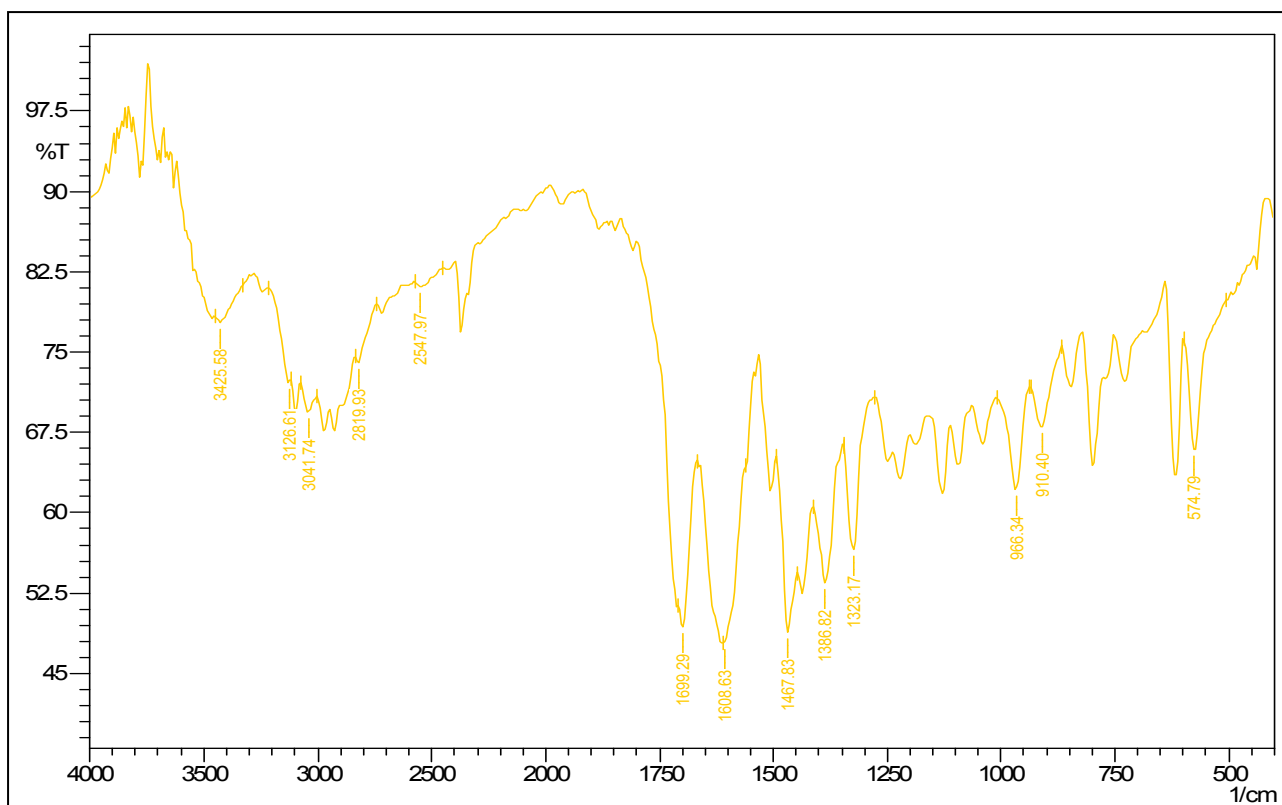

Fig. S31. FTIR spectrum of L4

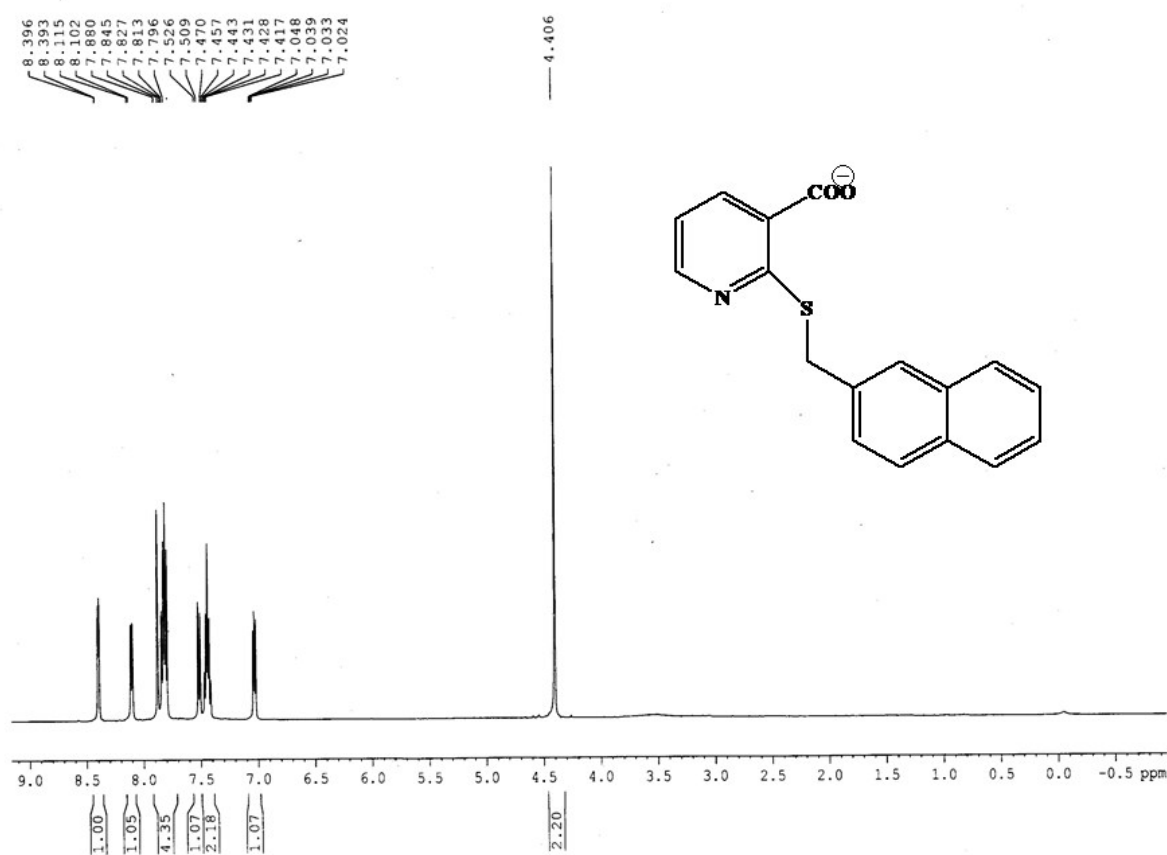

Fig. S32. <sup>1</sup>H NMR spectrum of L4 in DMSO-d<sub>6</sub>

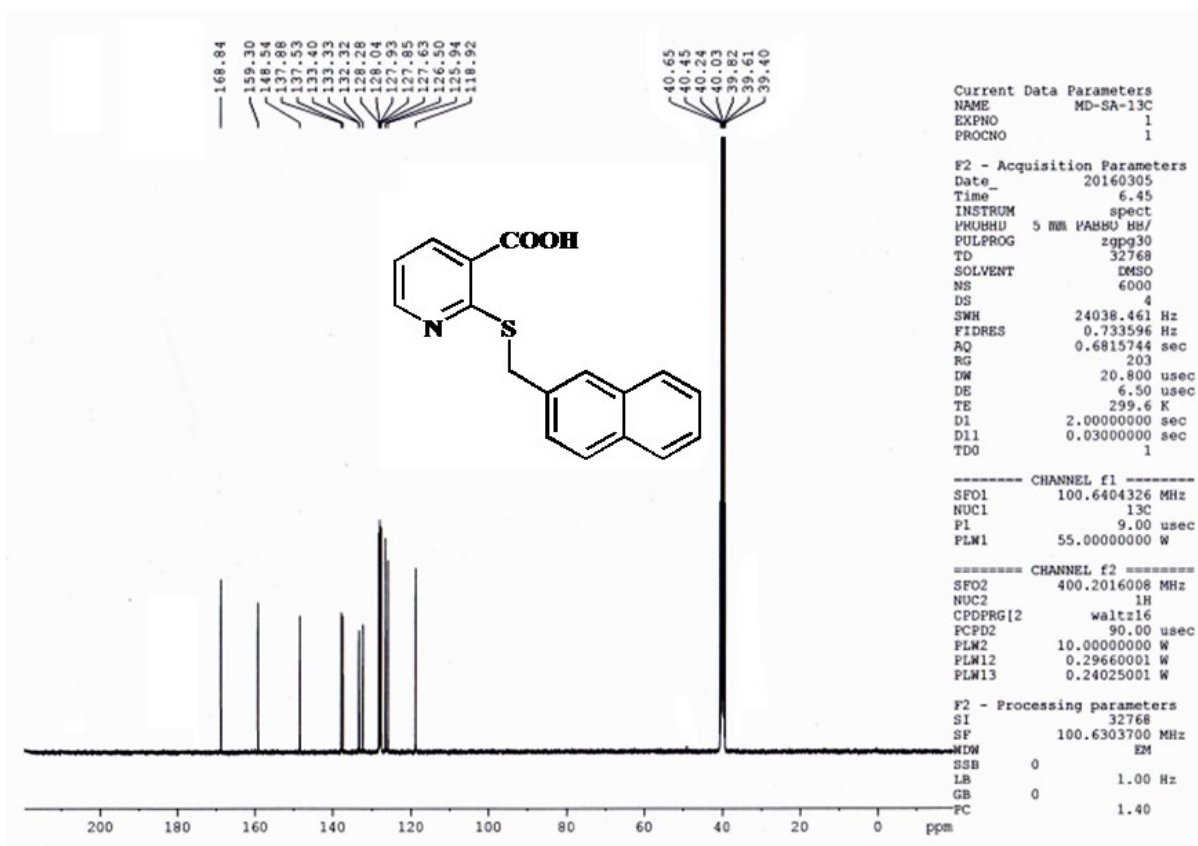

Fig. S33. <sup>13</sup>CNMR spectrum of L4 in DMSO-d<sub>6</sub>

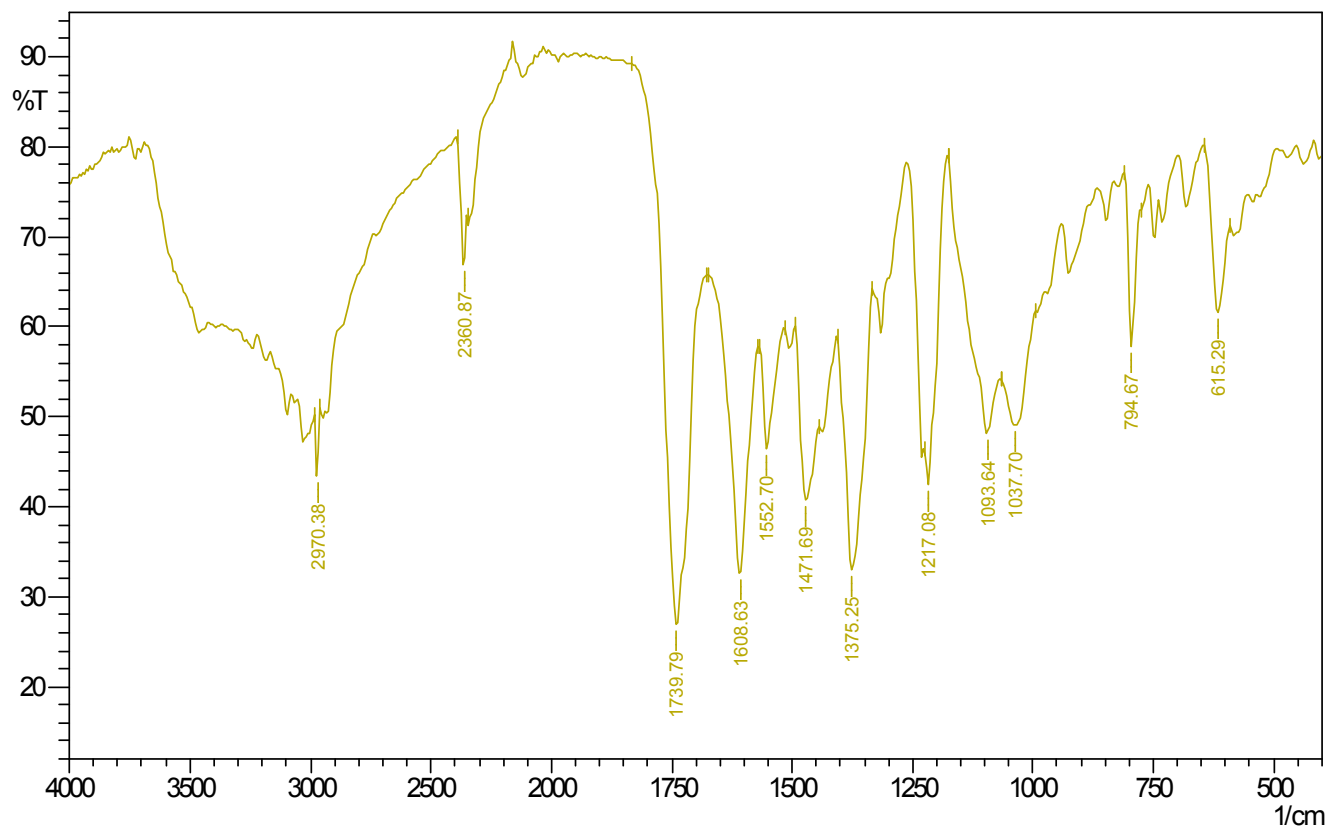

Fig. S34 FTIR spectrum of C1a

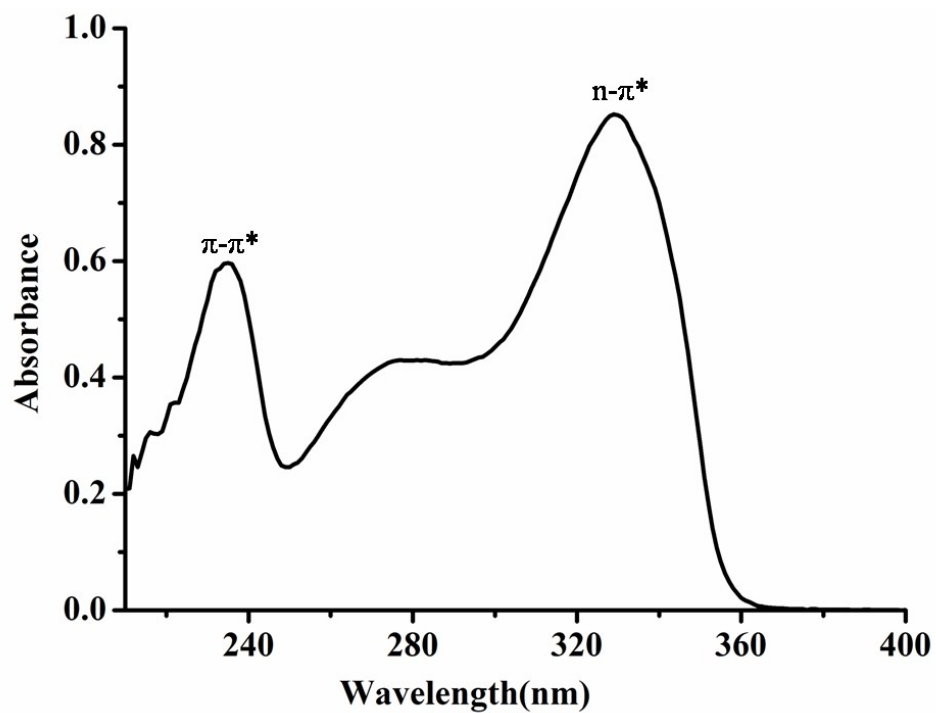

Fig. S35. UV-Vis spectrum of C1a in acetonitrile

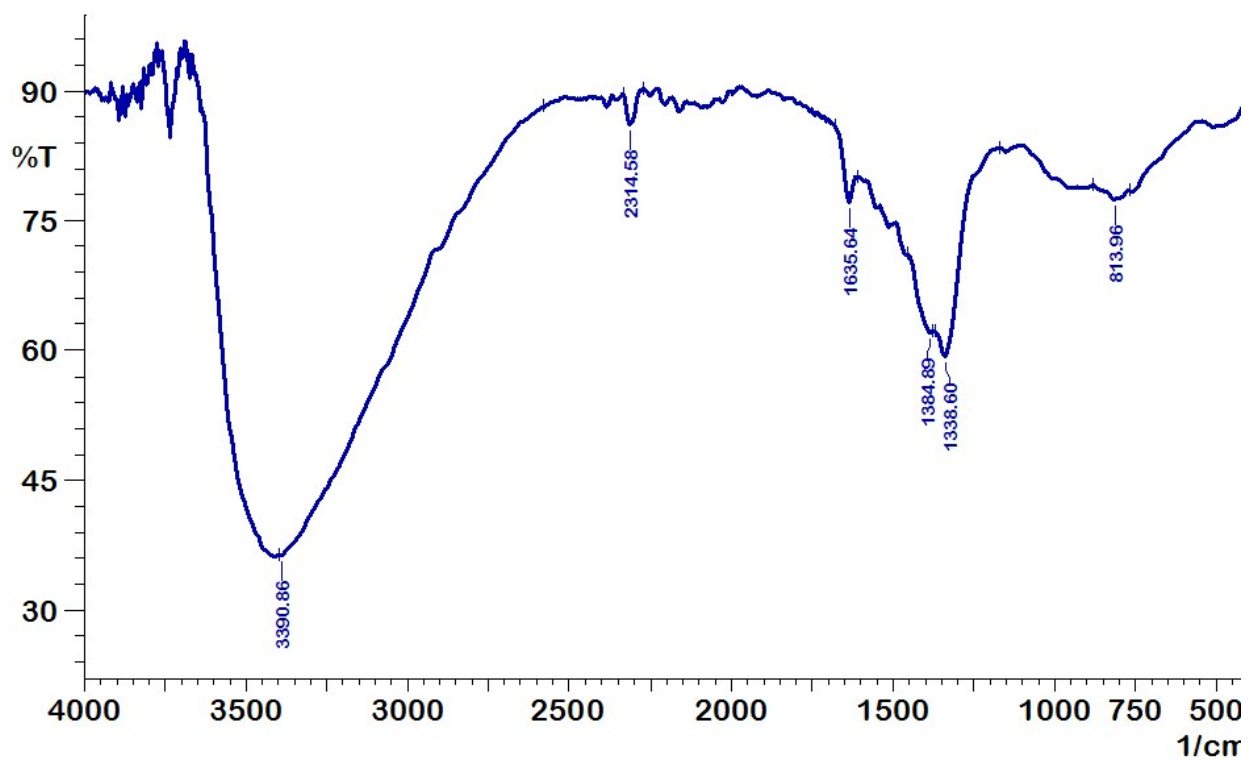

Fig. S36. FTIR spectrum of C2

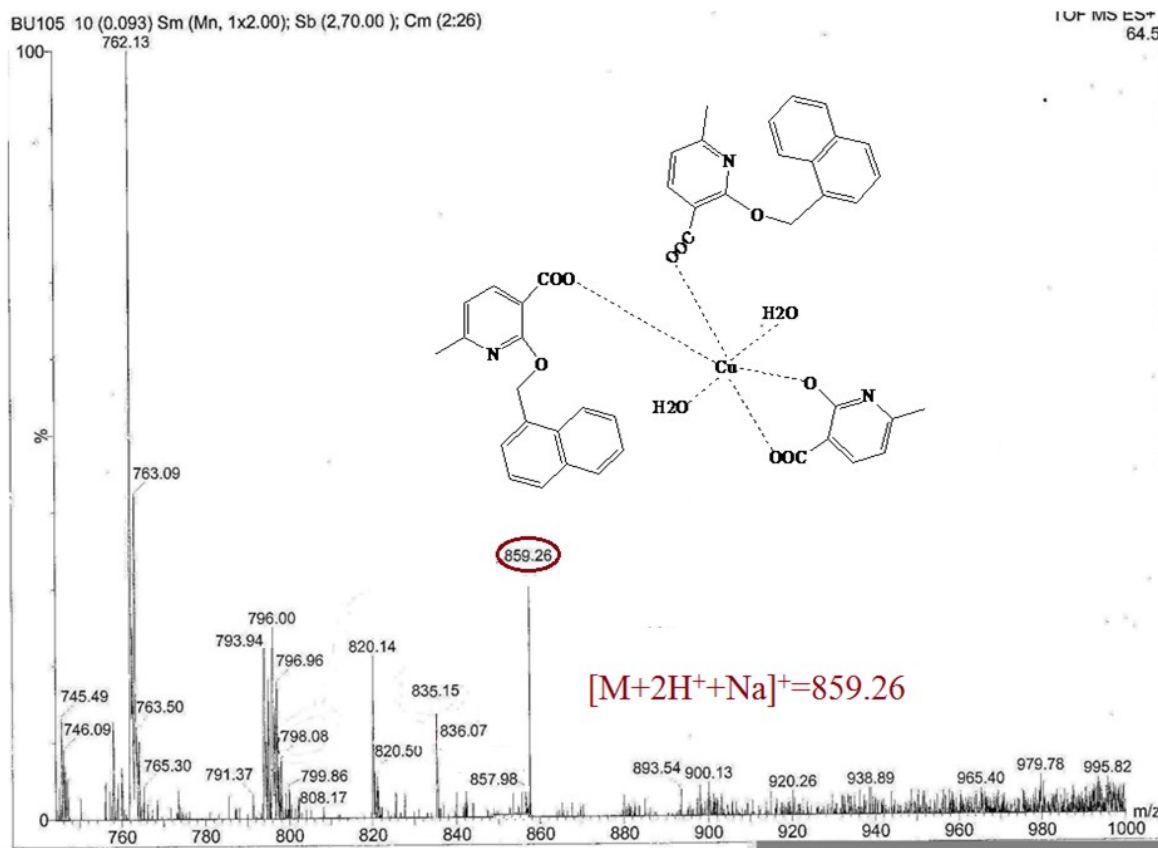

Fig. S37. ESI-MS spectrum of C2

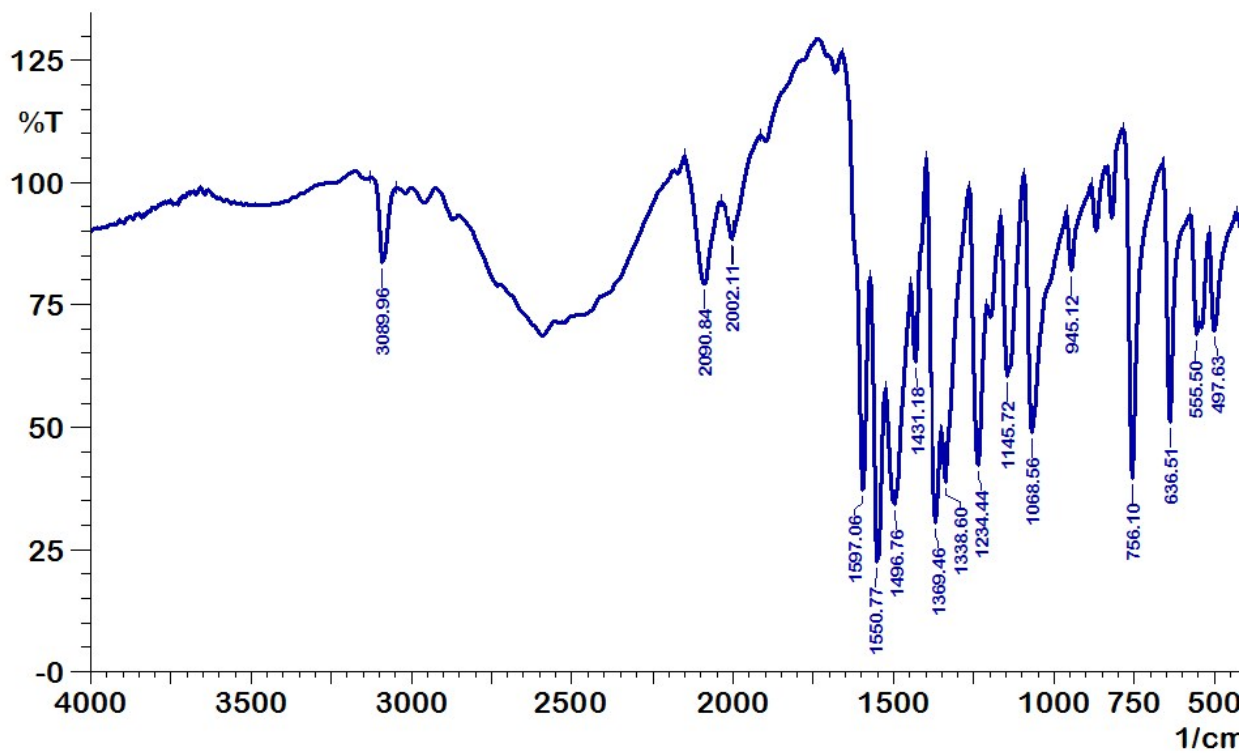

Fig. S38. FTIR spectrum of C3



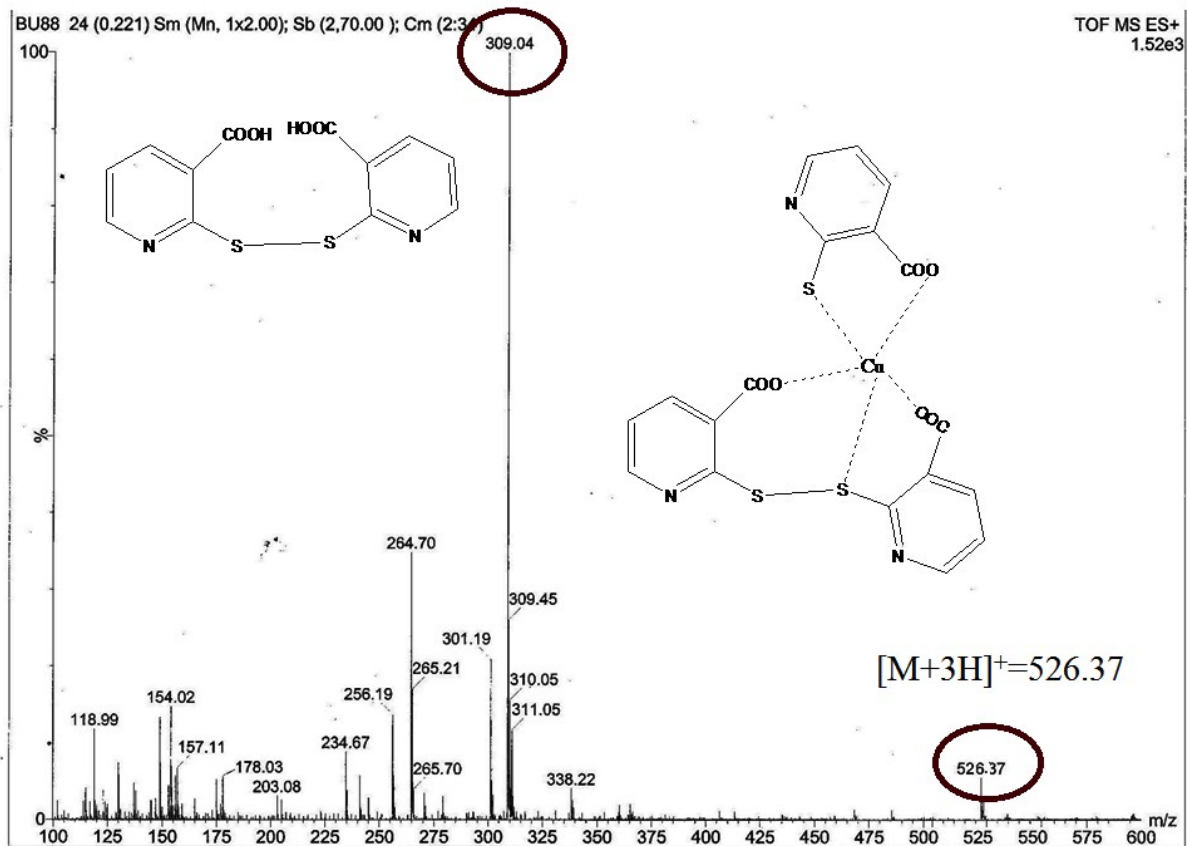

Fig. S39. ESI-MS of C3

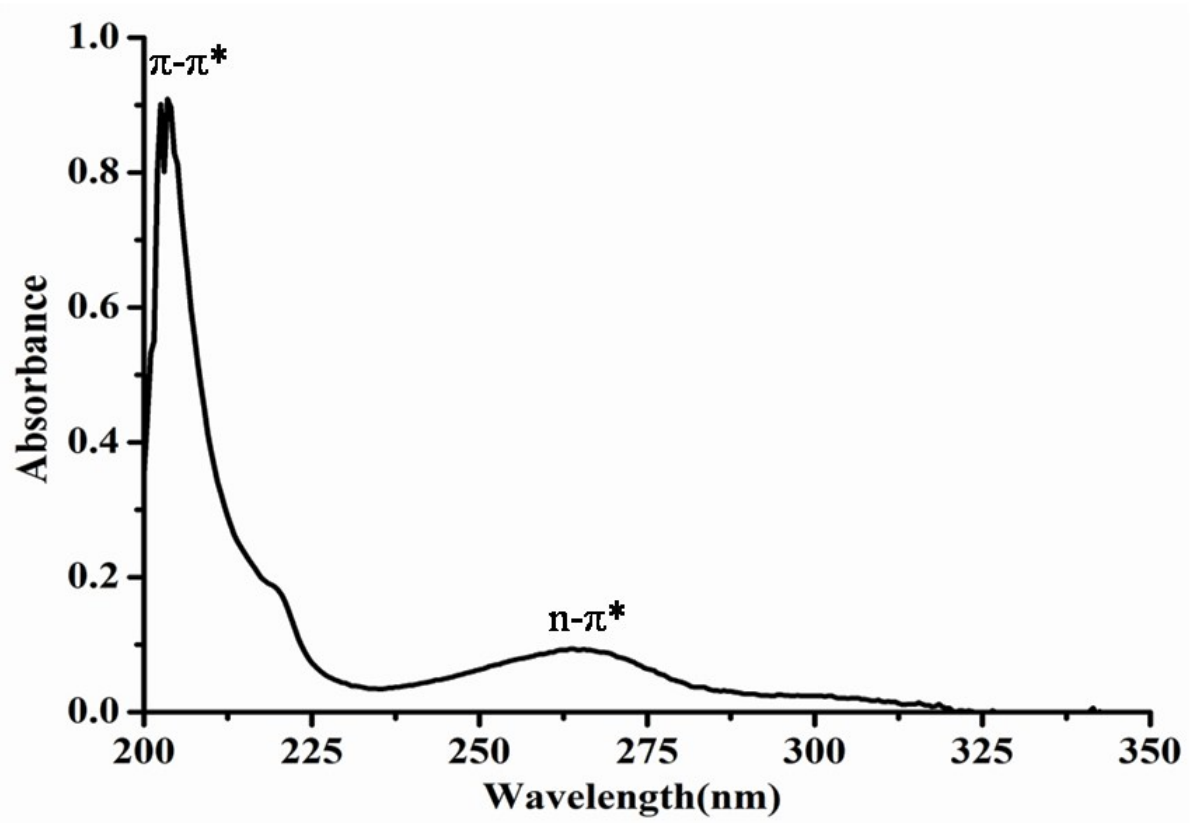

Fig. S40. UV-Vis spectrum of C3 in acetonitrile

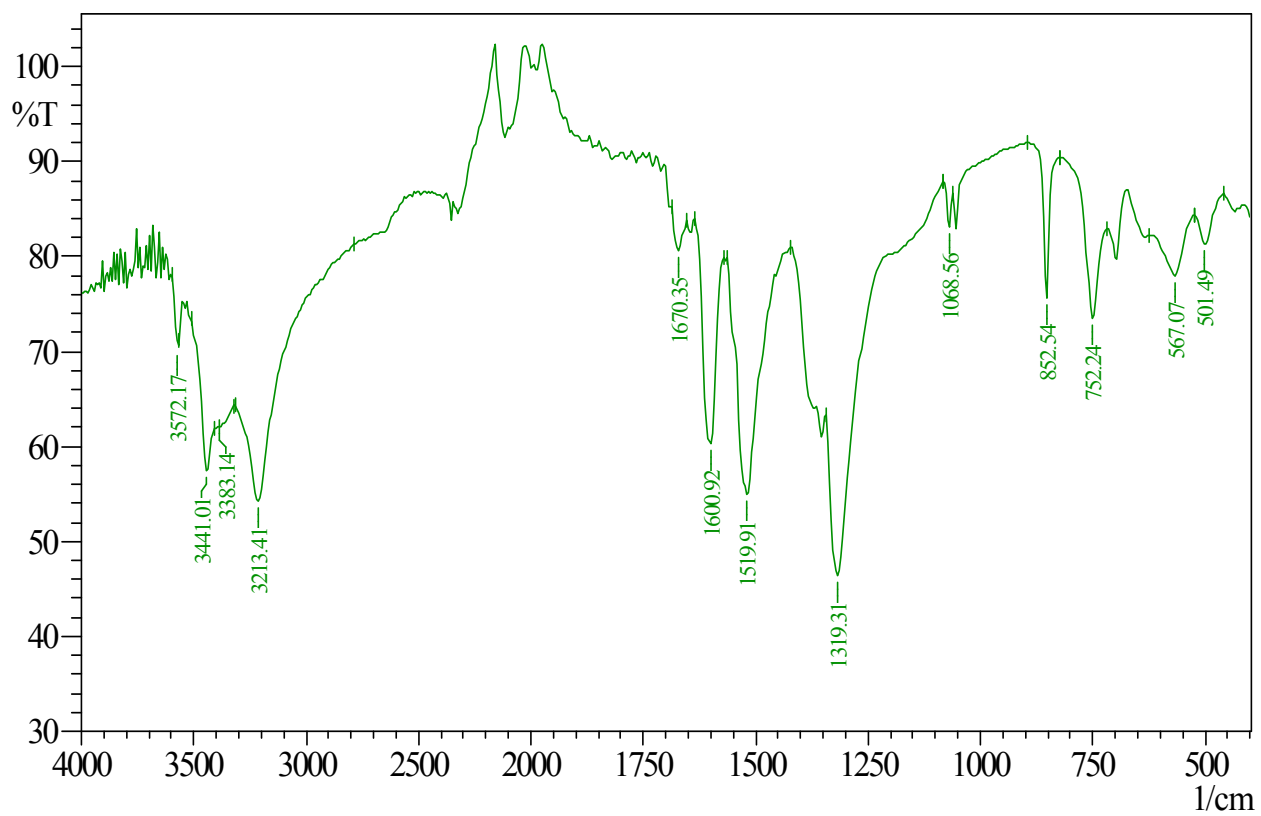

Fig. S41. FTIR spectrum of C4

**Table S1.** Bond lengths and bond angles in the Cu(II) coordination sphere of **C1a**

| Molecules                      | A          | B          |                | A          | B          |
|--------------------------------|------------|------------|----------------|------------|------------|
| Bond lengths (Å) <sup>a)</sup> |            |            |                |            |            |
| Cu-O(1)                        | 1.947(2)   | 1.937(2)   | Cu-O(21)       | 1.925(2)   | 1.937(2)   |
| Cu-O(10)                       | 1.960(2)   | 1.937(2)   | Cu-O(23)       | 2.308(3)   | 2.269(3)   |
| Cu-O(12)                       | 1.951(2)   | 1.960(5)   | Cu-O(x)        | 2.562(3)   | 2.596(3)   |
| Bond angles (°) <sup>a)</sup>  |            |            |                |            |            |
| O(1)-Cu-O(10)                  | 90.65(10)  | 93.24(9)   | O(10)-Cu-O(x)  | 79.82(10)  | 86.88(10)  |
| O(1)-Cu-O(12)                  | 175.64(11) | 175.93(14) | O(12)-Cu-O(21) | 92.87(9)   | 91.57(9)   |
| O(1)-Cu-O(21)                  | 89.19(10)  | 87.35(10)  | O(12)-Cu-O(23) | 89.02(9)   | 92.62(11)  |
| O(1)-Cu-O(23)                  | 87.02(10)  | 91.43(9)   | O(12)-Cu-O(x)  | 81.65(10)  | 90.97(10)  |
| O(1)-Cu-O(x)                   | 102.16(10) | 85.05(10)  | O(21)-Cu-O(23) | 93.26(10)  | 99.03(10)  |
| O(10)-Cu-O(12)                 | 87.91(10)  | 87.42(9)   | O(21)-Cu-O(x)  | 91.56(10)  | 86.98(10)  |
| O(10)-Cu-O(21)                 | 171.15(11) | 173.75(12) | O(23)-Cu-O(x)  | 169.70(12) | 172.91(12) |
| O(10)-Cu-O(23)                 | 95.58(10)  | 87.18(11)  |                |            |            |

a)  $x$  denotes 111 for molecule A and 211 for molecule B.

**Table S2.** Hydrogen bond dimensions of **C1a**

| D-H...A <sup>a)</sup>                   | H...A (Å) | D...A (Å) | D-H...A (°) |
|-----------------------------------------|-----------|-----------|-------------|
| O(3)-H(3A)...O(14A) [1+x,y,z]           | 1.60(5)   | 2.441(3)  | 170(4)      |
| N(6A)-H(6A)...O(300)                    | 1.96(2)   | 2.825(4)  | 173(3)      |
| N(6B)-H(6B)...O(100)                    | 1.89(2)   | 2.750(4)  | 168(4)      |
| O(14B)-H(14B)...O(3B) [-1+x,y,z]        | 1.63(7)   | 2.462(3)  | 156(8)      |
| N(17A)-H(17A)...O(200) [1-x,-1/2+y,1-z] | 1.976(17) | 2.852(4)  | 174(2)      |
| N(17B)-H(17B)...O(400)                  | 1.898(17) | 2.777(4)  | 173(4)      |
| O(23A)-H(23A)...O(10B) [1-x,-1/2+y,1-z] | 2.01(3)   | 2.804(3)  | 163(3)      |
| O(23A)-H(23A)...O(12B) [1-x,-1/2+y,1-z] | 2.50(3)   | 3.032(3)  | 124(3)      |
| O(23A)-H(23B)...O(3B) [2-x,-1/2+y,1-z]  | 1.97(4)   | 2.791(4)  | 178(4)      |
| O(23B)-H(23C)...O(300) [1-x,1/2+y,1-z]  | 2.03(3)   | 2.825(4)  | 158(4)      |
| O(23B)-H(23D)...O(12A) [1-x,1/2+y,1-z]  | 2.29(3)   | 3.103(3)  | 166(4)      |
| O(100)-H(101)...O(131)                  | 1.98(4)   | 2.774(4)  | 159(5)      |
| O(100)-H(102)...O(23A) [1-x,1/2+y,1-z]  | 2.04(5)   | 2.753(4)  | 144(4)      |
| O(200)-H(201)...O(121)                  | 2.06(2)   | 2.885(5)  | 172(5)      |
| O(200)-H(202)...O(231) [1-x,1/2+y,1-z]  | 2.15(3)   | 2.928(4)  | 158(5)      |
| O(300)-H(301)...O(211) [-1+x,y,-1+z]    | 2.18(4)   | 2.974(5)  | 161(4)      |
| O(300)-H(302)...O(21B) [-1+x,y,-1+z]    | 2.09(4)   | 2.855(4)  | 152(4)      |
| O(400)-H(401)...O(10A) [1+x,y,1+z]      | 2.23(3)   | 2.987(4)  | 151(4)      |
| O(400)-H(401)...O(111) [1+x,y,1+z]      | 2.48(5)   | 3.024(4)  | 124(3)      |
| O(400)-H(402)...O(221) [2-x,1/2+y,2-z]  | 2.16(3)   | 2.928(4)  | 155(3)      |

a) D and A mean hydrogen bond donors and acceptors, respectively.

Table S3. Selected bond lengths (Å) and bond angles (°) of **C1b**

|                    |            |                    |            |
|--------------------|------------|--------------------|------------|
| Bond lengths       |            |                    |            |
| Cu(1)-C(11)        | 2.673(3)   | Cu(1)-O(11)        | 2.780(13)  |
| Cu(1)-O(1)         | 1.968(3)   | Cu(1)-O(1W)        | 1.973(5)   |
| Cu(2)-O(2)         | 1.898(3)   | Cu(2)-O(3)         | 1.933(3)   |
| Cu(2)-O(2W)        | 2.237(6)   |                    |            |
| Bond angles        |            |                    |            |
| O(1)-Cu(1)-O(1)*   | 180.0      | C(11)-Cu(1)-O(1)   | 95.95(10)  |
| O(1)*-Cu(1)-O(1W)  | 98.8(2)    | O(1)-Cu(1)-O(1W)   | 81.2(2)    |
| O(1W)-Cu(1)-O(1W)* | 180.0(4)   | O(1)*-Cu(1)-Cl(1)  | 84.05(10)  |
| O(1)-Cu(1)-Cl(1)   | 95.95(10)  | C(11)-Cu(1)-C(11)  | 180.0      |
| O(1)-Cu(1)-O(11)   | 82.69(17)  | O(11)-Cu(1)-O(11)* | 180.0      |
| O(1)*-Cu(1)-O(11)  | 97.31(17)  | O(11)-Cu(1)-O(1W)  | 80.1(4)    |
| O(2)-Cu(2)-O(2)**  | 172.2(2)   | O(2)-Cu(2)-O(3)**  | 86.92(14)  |
| O(2)-Cu(2)-O(3)    | 91.96(14)  | O(3)-Cu(2)-O(3)**  | 163.52(19) |
| O(2)-Cu(2)-O(2W)   | 103.46(16) | O(2)-Cu(2)-O(2W)** | 84.37(15)  |
| O(3)-Cu(2)-O(2W)   | 94.0(2)    | O(3)-Cu(2)-O(2W)** | 102.2(2)   |

\* and \*\* stand for  $3/2-x, -y, 1/2-z$  and  $x, -1/4-y, 3/4-z$ , respectively.

Table S4. Selected bond lengths (Å) and angles (°) of **C4**

|                                |           |                                              |            |
|--------------------------------|-----------|----------------------------------------------|------------|
| Bond lengths                   |           |                                              |            |
| Cu(1)-O(8)                     | 2.602(8)  | Cu(1)-O(39) <sup>i</sup>                     | 1.947(2)   |
| Cu(1)-O(9) <sup>i</sup>        | 1.964(2)  | Cu(1)-O(1w)                                  | 2.197(2)   |
| Cu(1)-O(38)                    | 1.951(2)  | Cu(1)-Cu(1) <sup>i</sup>                     | 2.603(8)   |
| Bond angles                    |           |                                              |            |
| O(8)-Cu(1)-O(1W)               | 91.61(10) | O(9) <sup>i</sup> -Cu(1)-Cu(1) <sup>i</sup>  | 85.23(7)   |
| O(8)-Cu(1)-O(9) <sup>i</sup>   | 169.31(8) | O(9) <sup>i</sup> -Cu(1)-O(39)               | 90.46(9)   |
| O(8)-Cu(1)-O(38)               | 88.72(9)  | O(38)-Cu(1)-O(1W)                            | 86.61(10)  |
| O(8)-Cu(1)-O(39) <sup>i</sup>  | 89.04(9)  | O(38)-Cu(1)-Cu(1) <sup>i</sup>               | 80.94(6)   |
| O(8)-Cu(1)-Cu(1) <sup>i</sup>  | 84.07(6)  | O(38)-Cu(1)-O(39) <sup>i</sup>               | 169.23(9)  |
| O(9) <sup>i</sup> -Cu(1)-O(38) | 89.79(9)  | O(39) <sup>i</sup> -Cu(1)-O(1w)              | 104.10(10) |
| O(9) <sup>i</sup> -Cu(1)-O(1W) | 98.88(10) | O(39) <sup>i</sup> -Cu(1)-Cu(1) <sup>i</sup> | 88.34(6)   |
| O(1W)-Cu(1)-Cu(1) <sup>i</sup> | 166.80(7) |                                              |            |

a) <sup>i</sup> stands for the symmetry operation  $-x, -y, -z$

**Table S5** Crystal data and refinement parameters

| Compound                                                   | L1                                                          | C1a                                                                | C1b                                                                                                                                                                   | C4                                                                                             |
|------------------------------------------------------------|-------------------------------------------------------------|--------------------------------------------------------------------|-----------------------------------------------------------------------------------------------------------------------------------------------------------------------|------------------------------------------------------------------------------------------------|
| Molecular formula                                          | L1                                                          | [Cu(L1)(H <sub>2</sub> O)(SO <sub>4</sub> )]·<br>2H <sub>2</sub> O | [Cu <sub>2</sub> (L <sup>1</sup> ) <sub>2</sub> (H <sub>2</sub> O) <sub>3</sub> ] <sub>n</sub> (<br>NO <sub>3</sub> ) <sub>n</sub> Cl <sub>n</sub> ·nH <sub>2</sub> O | [Cu <sub>2</sub> (L4) <sub>4</sub> (H <sub>2</sub> O) <sub>2</sub><br>]·1.12(H <sub>2</sub> O) |
| Empirical formula                                          | C <sub>7</sub> H <sub>7</sub> NO <sub>3</sub>               | C <sub>14</sub> H <sub>20</sub> CuN <sub>2</sub> O <sub>13</sub> S | C <sub>14</sub> H <sub>20</sub> ClCu <sub>2</sub> N <sub>3</sub> O <sub>13</sub>                                                                                      | C <sub>68</sub> H <sub>54.24</sub> Cu <sub>2</sub> N <sub>4</sub> O<br>11.12S <sub>4</sub>     |
| Formula weight                                             | 153.14                                                      | 519.92                                                             | 600.86                                                                                                                                                                | 1360.66                                                                                        |
| Temperature(K)                                             | 293(2)                                                      | 100(2)                                                             | 100                                                                                                                                                                   | 110(2)                                                                                         |
| Crystal system                                             | Orthorhombic                                                | Monoclinic                                                         | Orthorhombic                                                                                                                                                          | Monoclinic                                                                                     |
| Space group                                                | Pbca                                                        | P2 <sub>1</sub>                                                    | F <sub>ddd</sub>                                                                                                                                                      | P2 <sub>1</sub> /c                                                                             |
| Unitcell<br>dimensions                                     |                                                             |                                                                    |                                                                                                                                                                       |                                                                                                |
| <i>a</i> (Å)                                               | 7.39817(15)                                                 | 8.7731(5)                                                          | 13.0670(9)                                                                                                                                                            | 19.4562(31)                                                                                    |
| <i>b</i> (Å)                                               | 13.0179(2)                                                  | 13.7449(7)                                                         | 17.8555(12)                                                                                                                                                           | 15.7960(25)                                                                                    |
| <i>c</i> (Å)                                               | 14.3767(3)                                                  | 16.6071(9)                                                         | 36.247(3)                                                                                                                                                             | 10.1007(16)                                                                                    |
| $\beta$ (°)                                                | 90.00                                                       | 93.648(2)                                                          | 90                                                                                                                                                                    | 103.170(2)                                                                                     |
| <i>V</i> (Å <sup>3</sup> )                                 | 1384.60(5)                                                  | 1998.52(2)                                                         | 8457.0(10)                                                                                                                                                            | 3022.6(9)                                                                                      |
| Z                                                          | 8                                                           | 4                                                                  | 16                                                                                                                                                                    | 2                                                                                              |
| <i>D</i> <sub>calc</sub> (g/cm <sup>-3</sup> )             | 1.469                                                       | 1.728                                                              | 1.888                                                                                                                                                                 | 1.495                                                                                          |
| $\mu$ (mm <sup>-1</sup> )                                  | 0.117                                                       | 1.270                                                              | 2.212                                                                                                                                                                 | 0.909                                                                                          |
| <i>F</i> (000)                                             | 640                                                         | 1068                                                               | 4864.0                                                                                                                                                                | 1402.1                                                                                         |
| Crystal size (mm <sup>3</sup> )                            | 0.30×0.25×0.20                                              | 0.18×0.12×0.03                                                     | 0.20 x 0.22 x 0.23                                                                                                                                                    | 0.37×0.36×0.19                                                                                 |
| $\theta$ range for data<br>collection (°)                  | 3.47-25.35                                                  | 2.33-27.18                                                         | 0.454                                                                                                                                                                 | 2.43-23.16                                                                                     |
| Index ranges                                               | -8≤ <i>h</i> ≤8,<br>-15≤ <i>k</i> ≤15,<br>-17≤ <i>l</i> ≤17 | -11≤ <i>h</i> ≤11,<br>-17≤ <i>k</i> ≤17,<br>-21≤ <i>l</i> ≤21      | -16≤ <i>h</i> ≤13,<br>-22≤ <i>k</i> ≤21,<br>-45≤ <i>l</i> ≤45                                                                                                         | -24≤ <i>h</i> ≤23,<br>0≤ <i>k</i> ≤19,<br>0≤ <i>l</i> ≤12                                      |
| Reflections<br>collected                                   | 16333                                                       | 40334                                                              | 14568                                                                                                                                                                 | 24837                                                                                          |
| Independent<br>reflections, [R <sub>int</sub> ]            | 1242, [0.0296]                                              | 8790,<br>[0.0294]                                                  | 2169, [0.054]                                                                                                                                                         | 5953, [0.0566]                                                                                 |
| Final <i>R</i> indices                                     |                                                             |                                                                    |                                                                                                                                                                       |                                                                                                |
| <i>R</i> <sub>1</sub> , w <i>R</i> <sub>2</sub> [I>2σI]    | 0.0378,<br>0.1093,<br>[1169]                                | 0.0255,<br>0.0654,<br>[8279]                                       | 0.0433,<br>0.1202,<br>[1569]                                                                                                                                          | 0.0433,<br>0.0991,<br>[4434]                                                                   |
| <i>R</i> <sub>1</sub> , w <i>R</i> <sub>2</sub> (all data) | 0.0394, 0.1108                                              | 0.0283,<br>0.0664                                                  | 0.0433( 1569),<br>0.1202( 2169)                                                                                                                                       | 0.0694, 0.1123                                                                                 |
| Largest diff. peak<br>and hole (eÅ <sup>-3</sup> )         | 0.200 and -0.157                                            | 0.60 and -<br>0.58                                                 | 0.76, and -0.58,                                                                                                                                                      | 0.441 and -0.545                                                                               |

## References

1. R. Kubin, *J. Lumin.*, 1983, **27**, 455.
2. S. Roy, R. Banerjee and M. Sarkar, *J. Inorg. Biochem.*, 2006, **100**, 1320.
3. M. Tachibana and M. Iwaizumi, *J. Inorg. Biochem.*, 1987, **30**, 141.
4. S. Mukherjee, P. Das and S. Das, *J. Phy.Org. Chem.*, 2012, **25**, 385.

5. P. Das, C. K. Jain, S. K. Dey, R. Saha, A. DuttaChowdhury, S. Roychowdhury, S. Kumar, H. K. Majumdar and S. Das, *RSC Advances.*, 2014, **4**, 59344.
6. P. Das, P. S. Guin, P. C. Mandal, M. Paul, S. Paul and S. Das, *J. Phy.Org. Chem.*, 2011, **24**, 774.
7. P. S. Guin, S. Das and P. C. Mandal, *J. Inorg. Biochem.*, 2009, **103**, 1702.
8. S. Das, A. Saha and P. C. Mandal, *Talanta* 1996, **43**, 95.
9. H. Beraldo, A. G. Suillerot and L. Tosi, *Inorg. Chem.*, 1983, **22**, 4117.
10. M. Tachibana, M. Iwaizumi and S. Tero-Kobuta, *J. Inorg. Biochem.*, 1987, **30**, 133.
11. F. Morazzoni and A. Gervasini, *Inorg. Chim. Acta.*, 1987, **136**, 111.
12. S. Mukherjee, P. Das and S. Das, *J. Phy.Org. Chem.*, 2012, **25**, 385.
13. S. Roy, R. Banerjee and M. Sarkar, *J. Inorg. Biochem.*, 2006, **100**, 1320.
14. S. Chakraborti, B. Bhattacharyya and D. Dasgupta, *J. Phys. Chem.*, B 2002, **106**, 6947.
15. G. Scatchard, *N. Y. Ann. Acad. Sci.*, 1949, **51**, 660.
16. O. V. Dolomanov, L. J. Bourhis, R. J. Gildea, J. A. K. Howard and H. Puschmann, *J. Appl. Crystallogr.*, 2009, **42**, 339.
